# Supplementary figures and images for: An efficient and chemoselective synthesis of benzo[e][1,4]thiazepin-2(1H,3H,5H)-ones via a microwave-assisted multi-component reaction in water
Source: Royal Society of Chemistry journal article supplement (doi:10.1039/b815879g), 2009-01-01

All NMR spectra for the new compounds

4a:

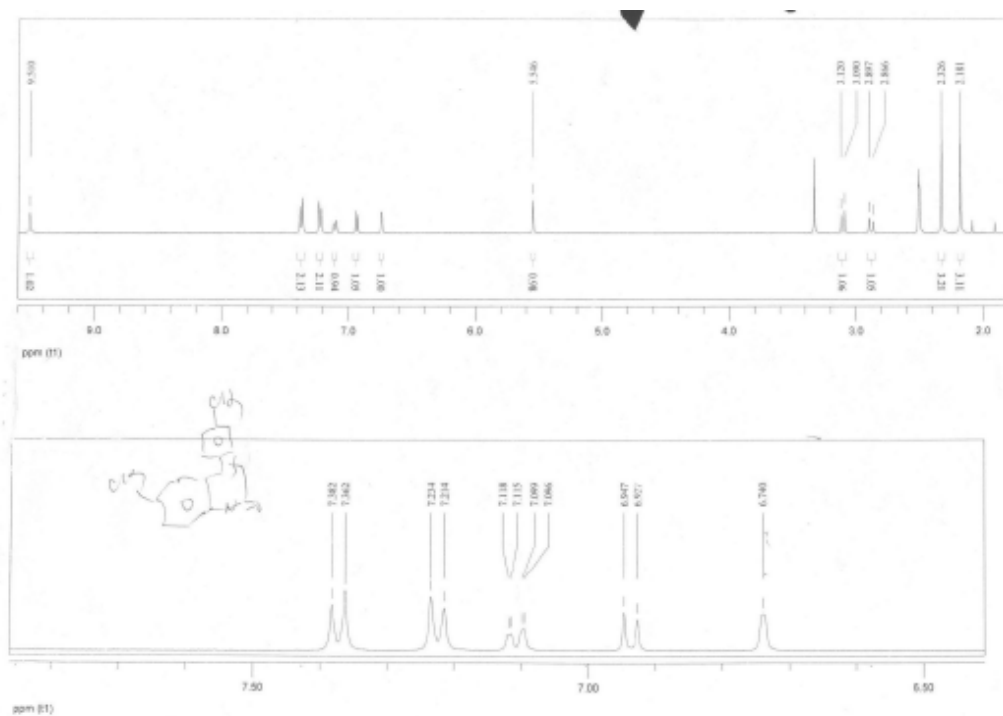

4b

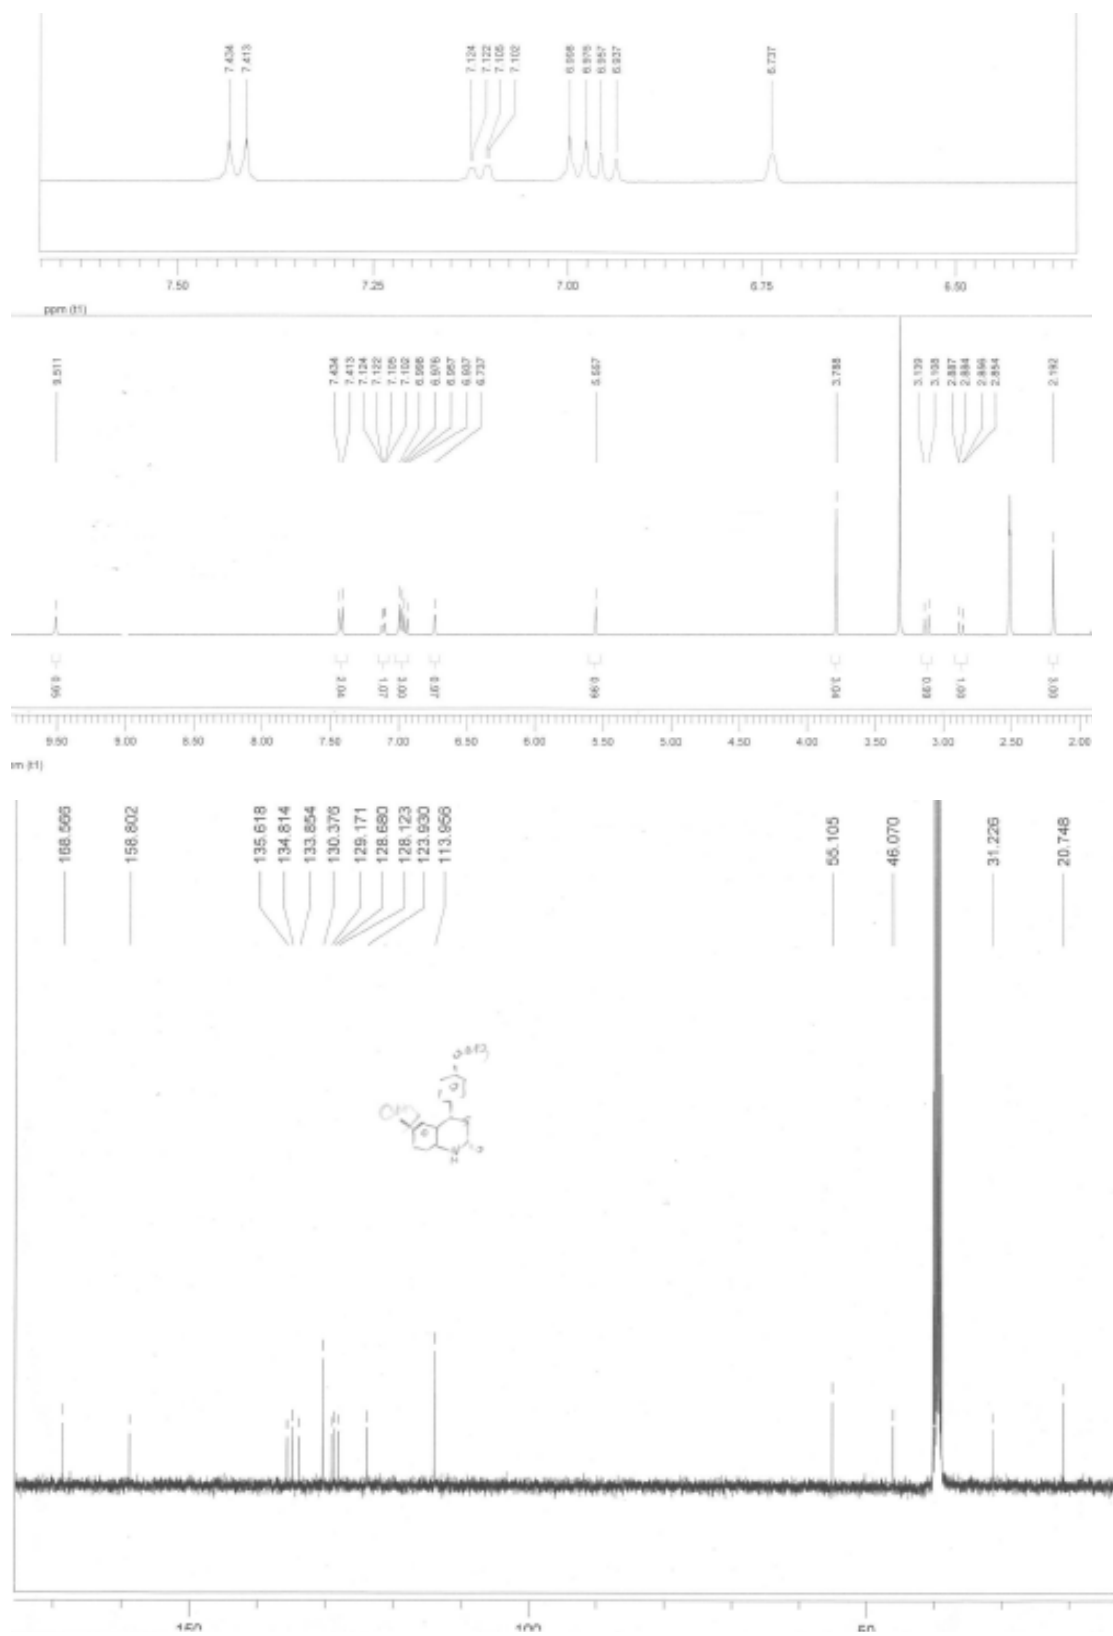

4c

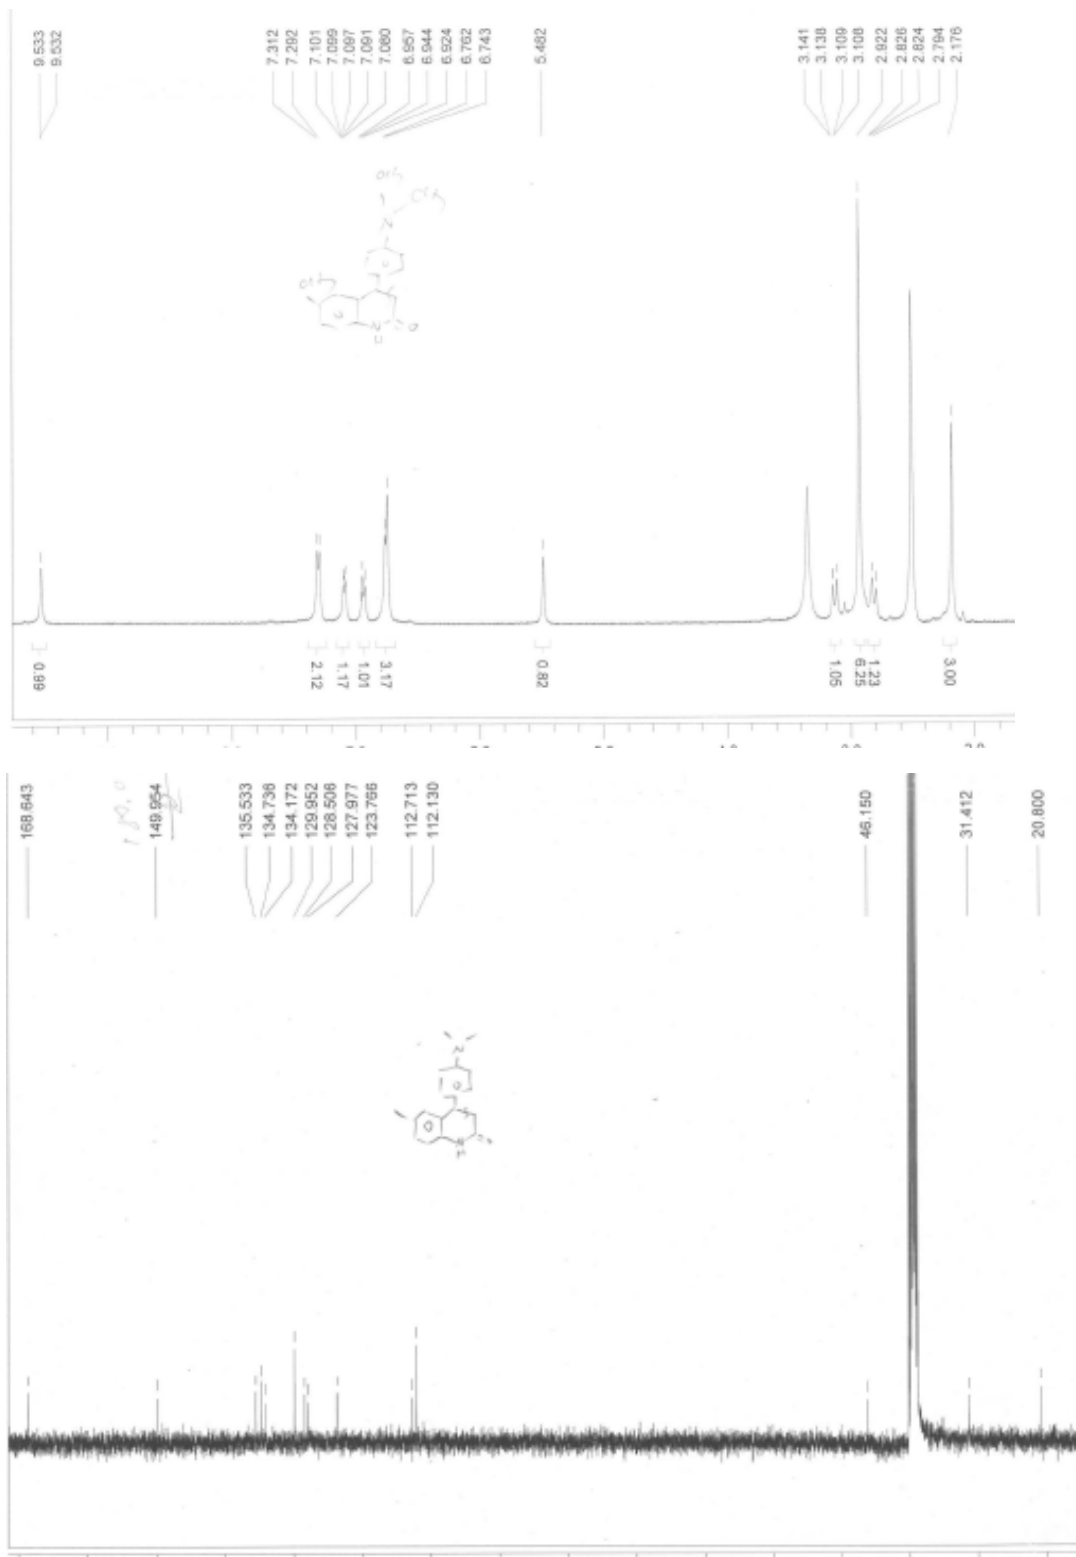

4d

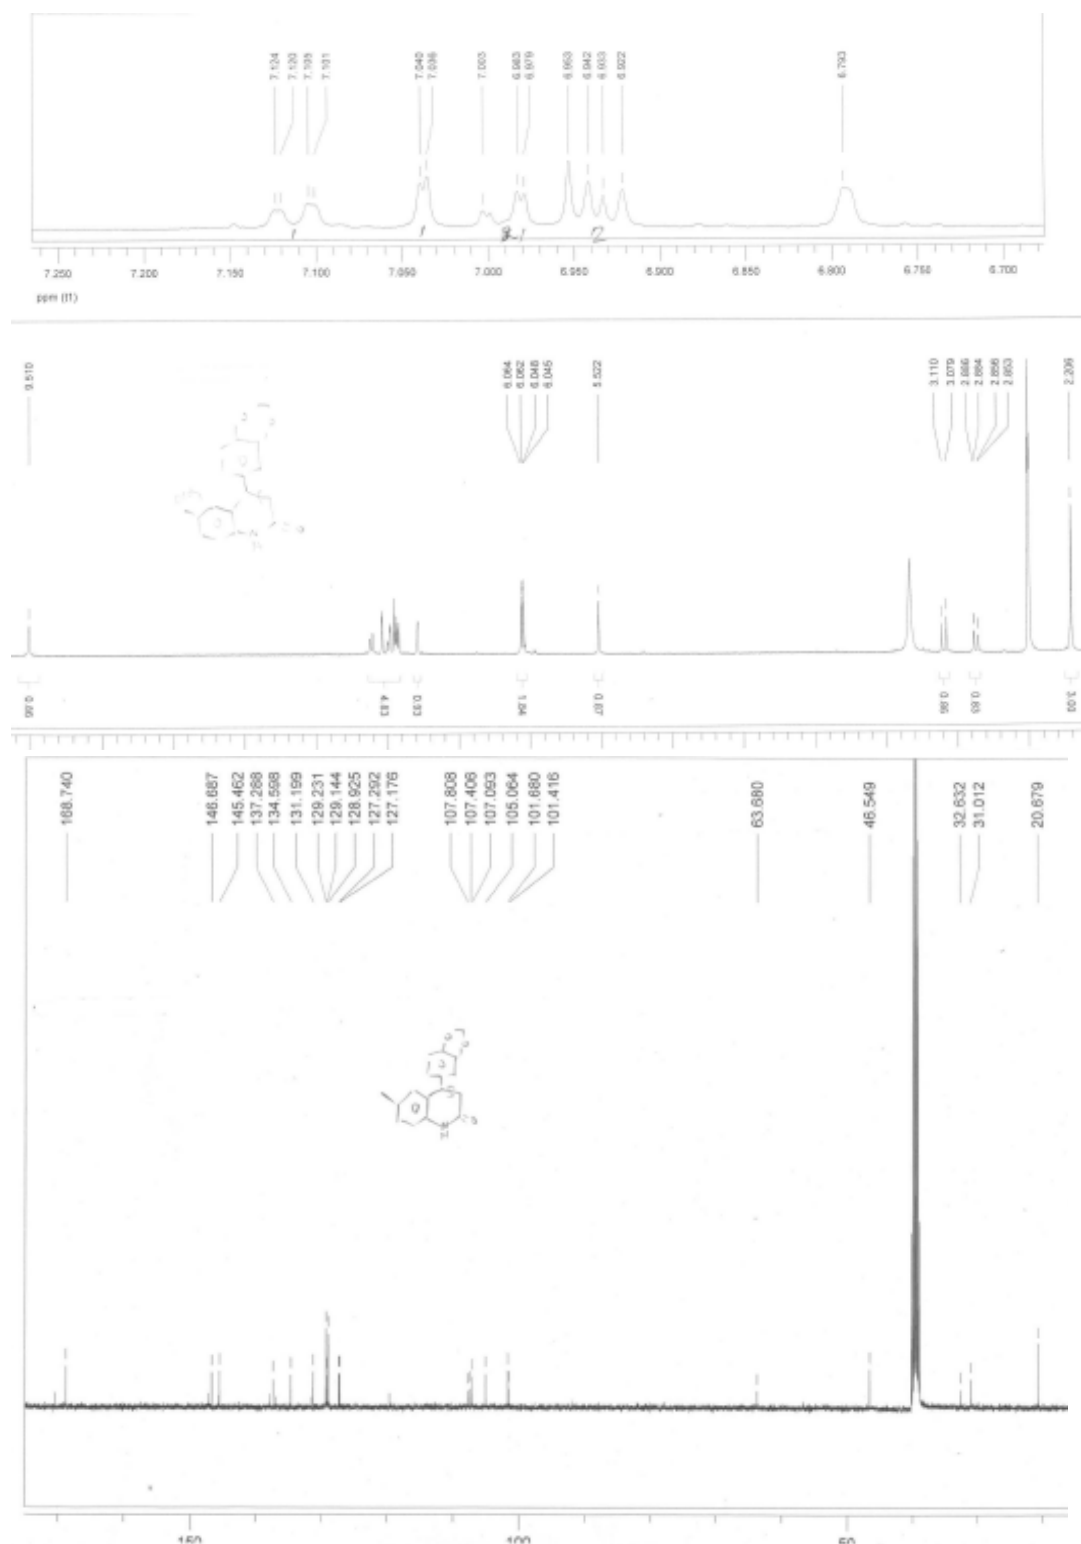

4e

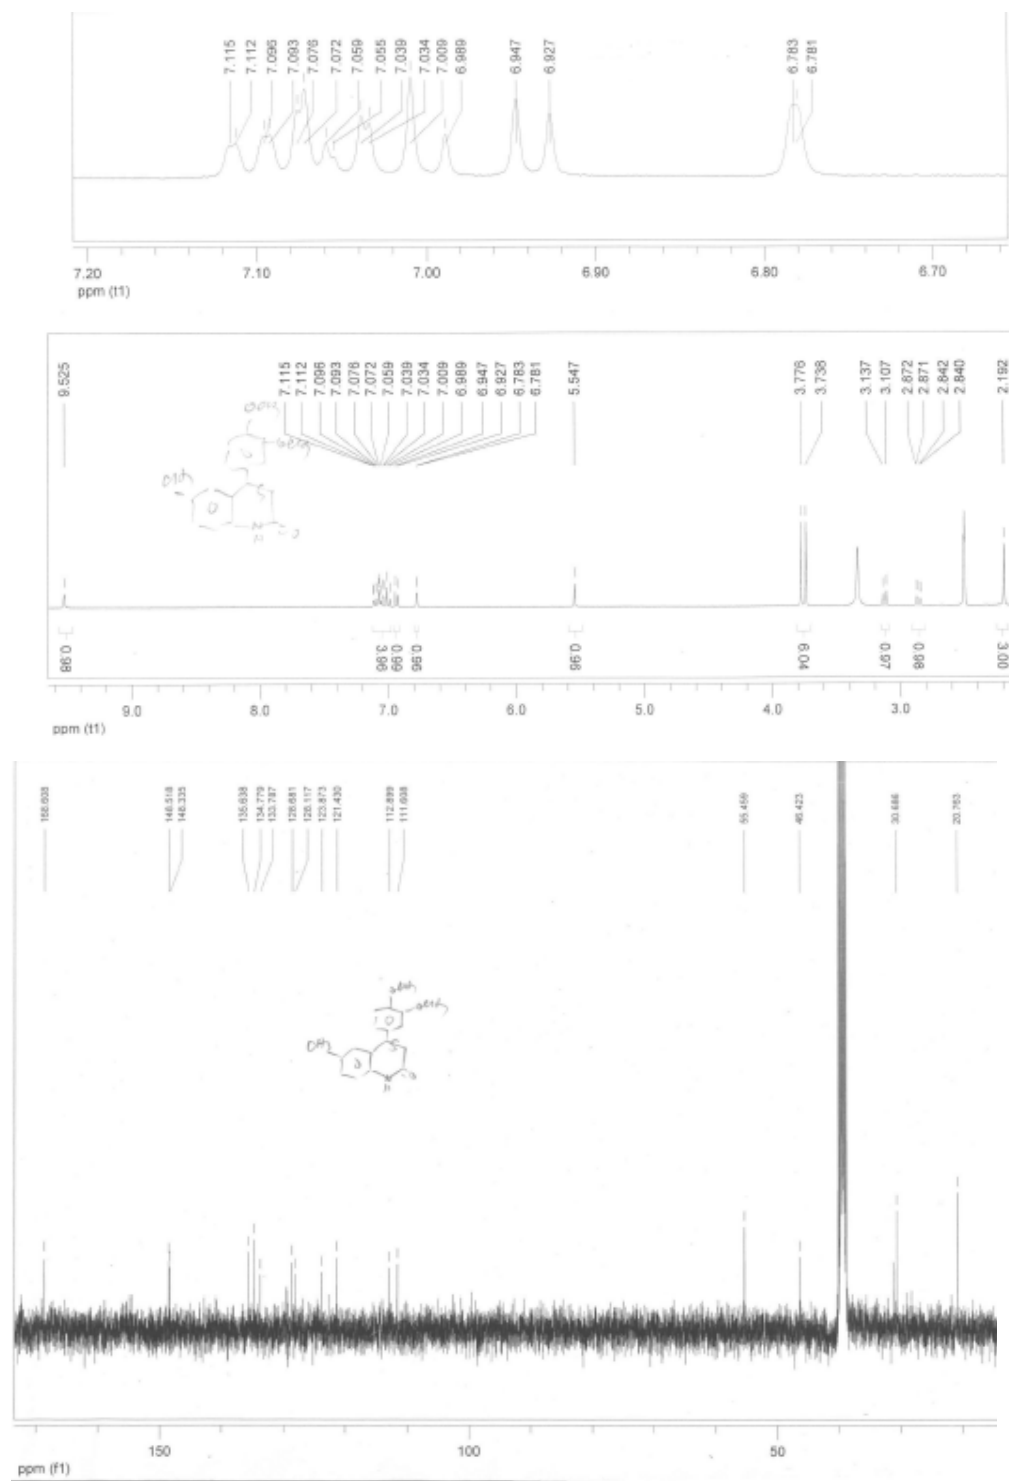

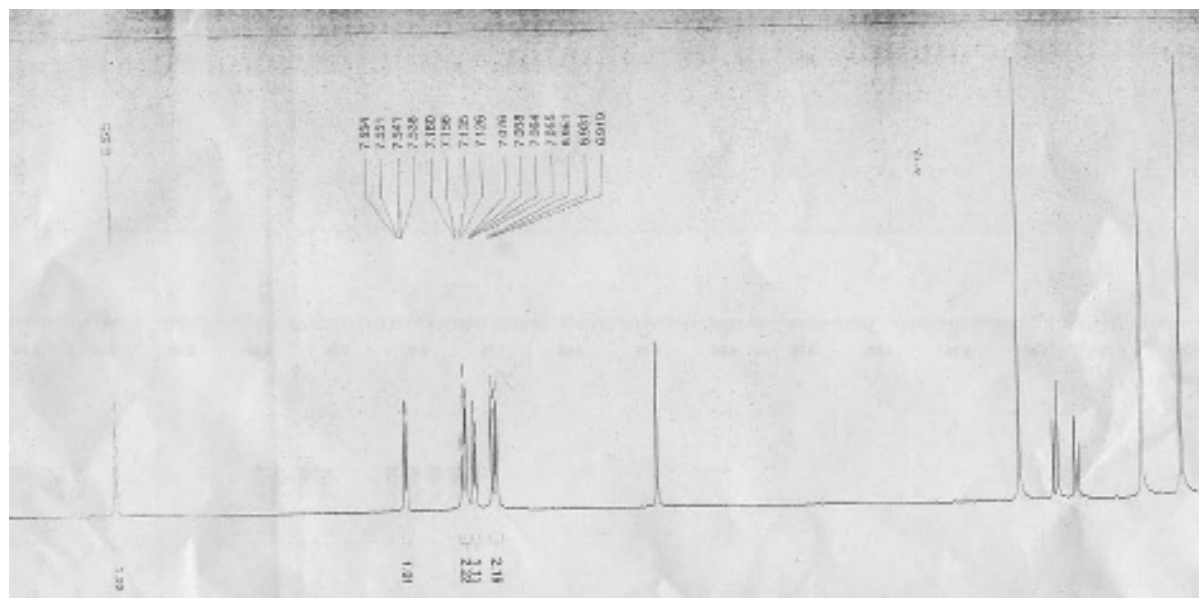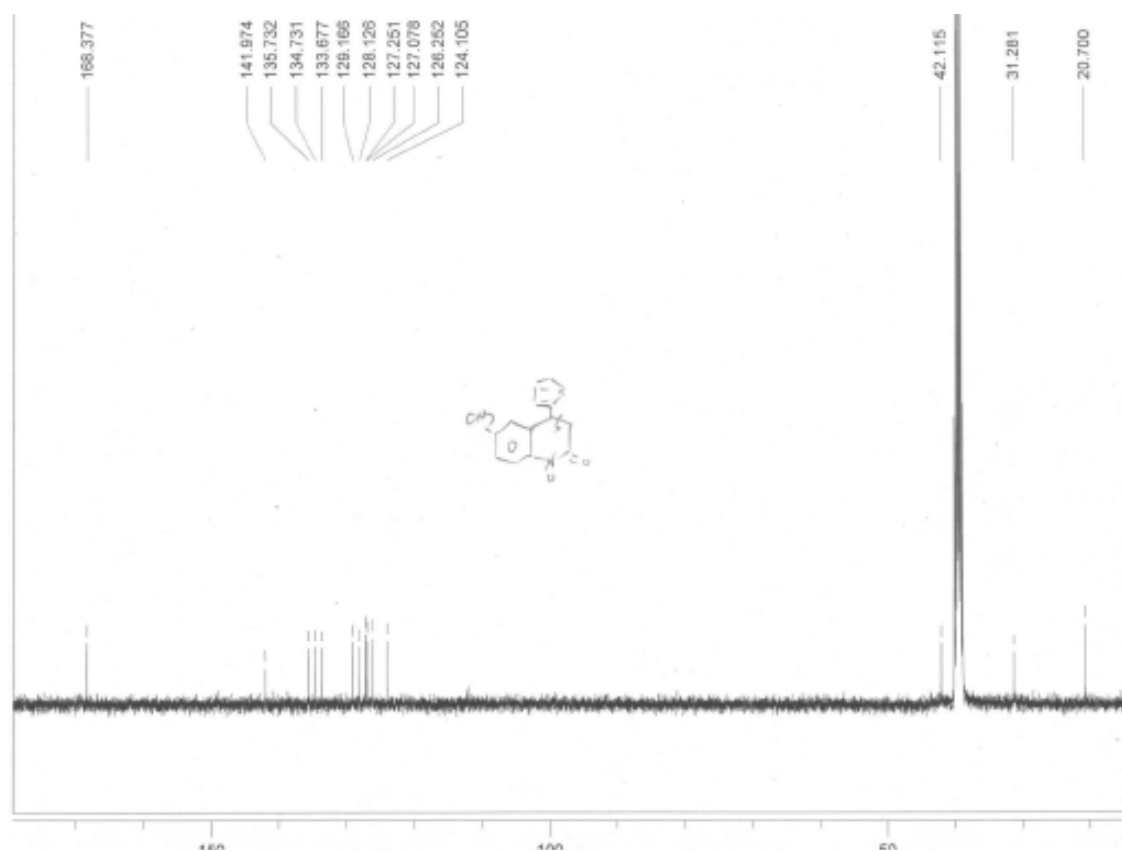

4g

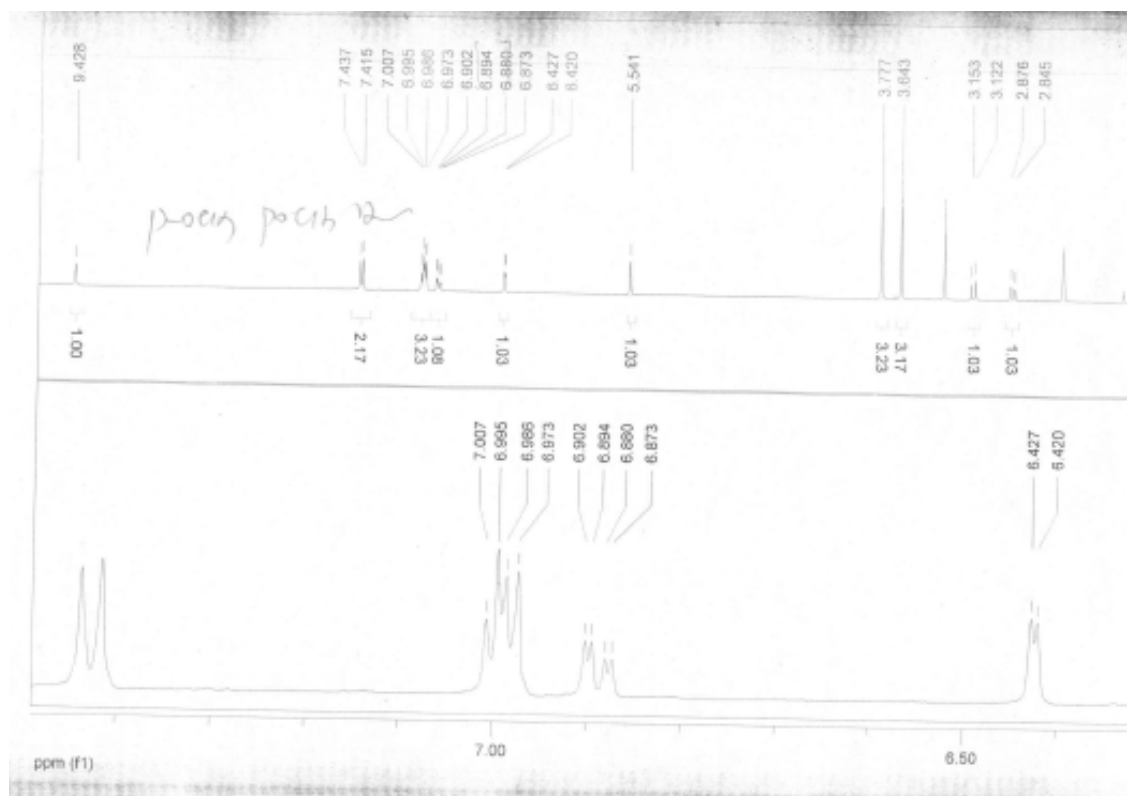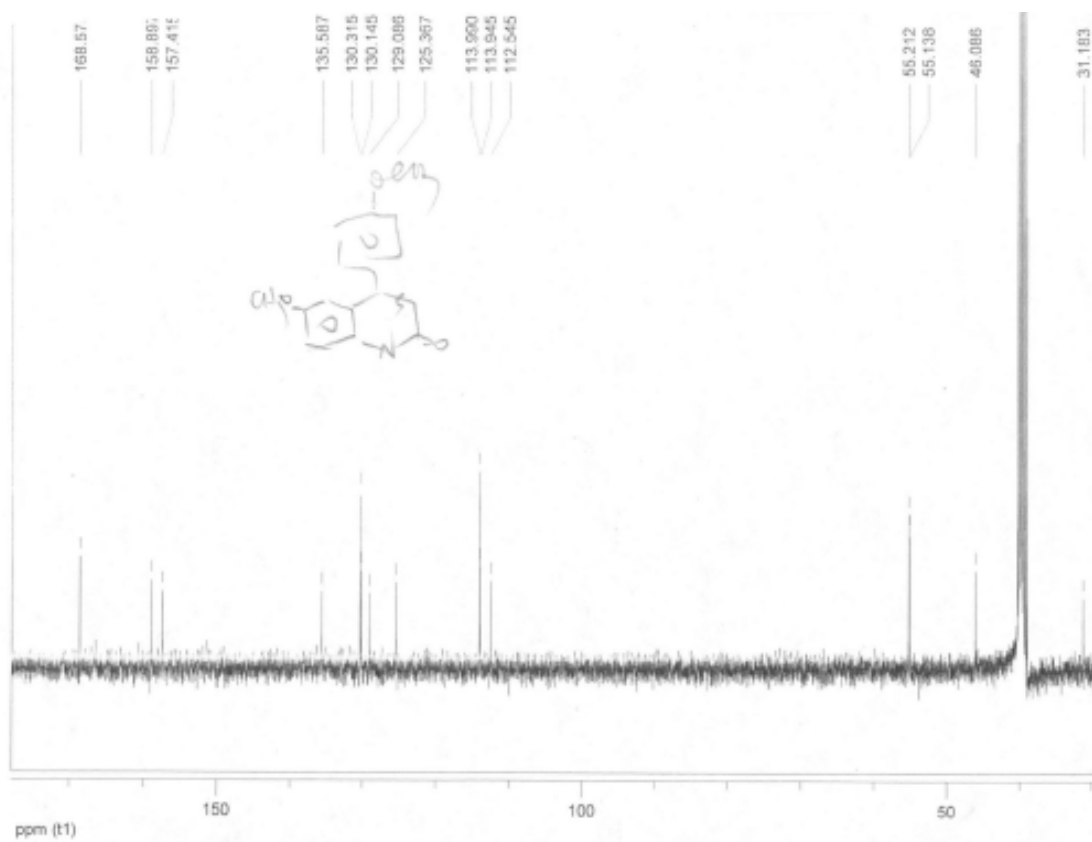

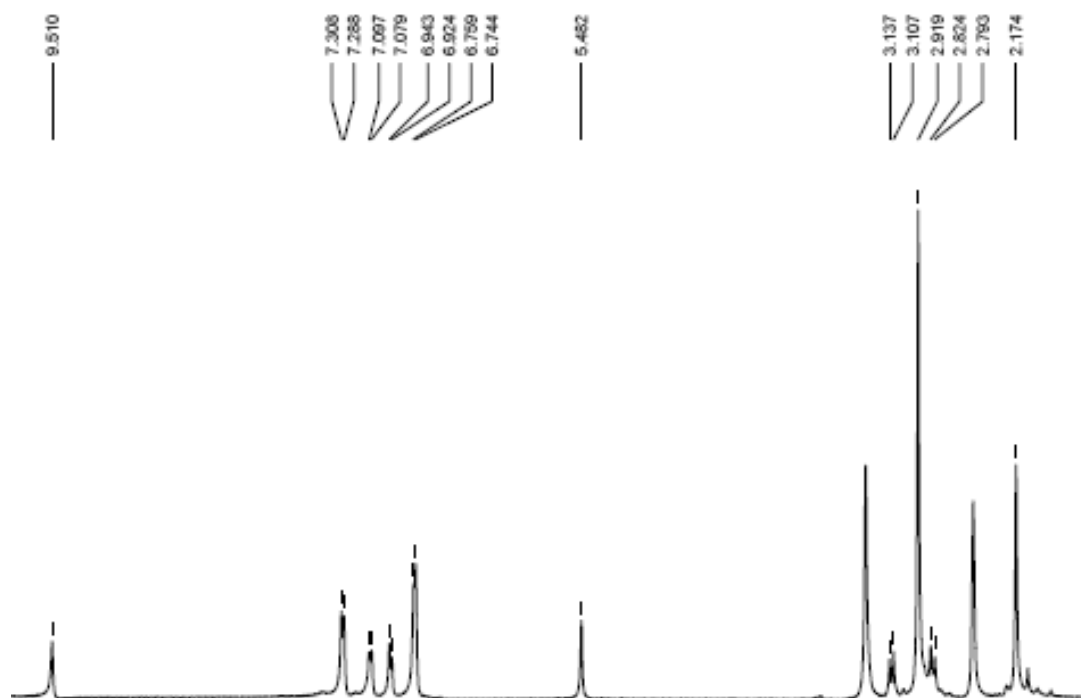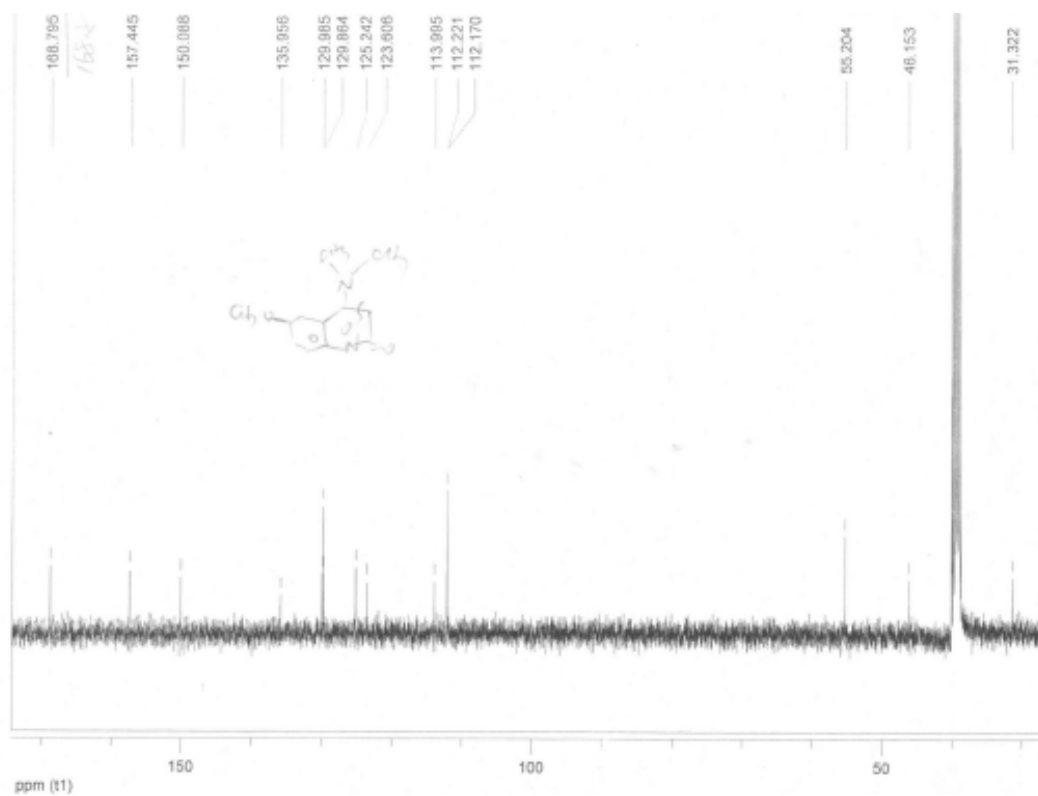

4j



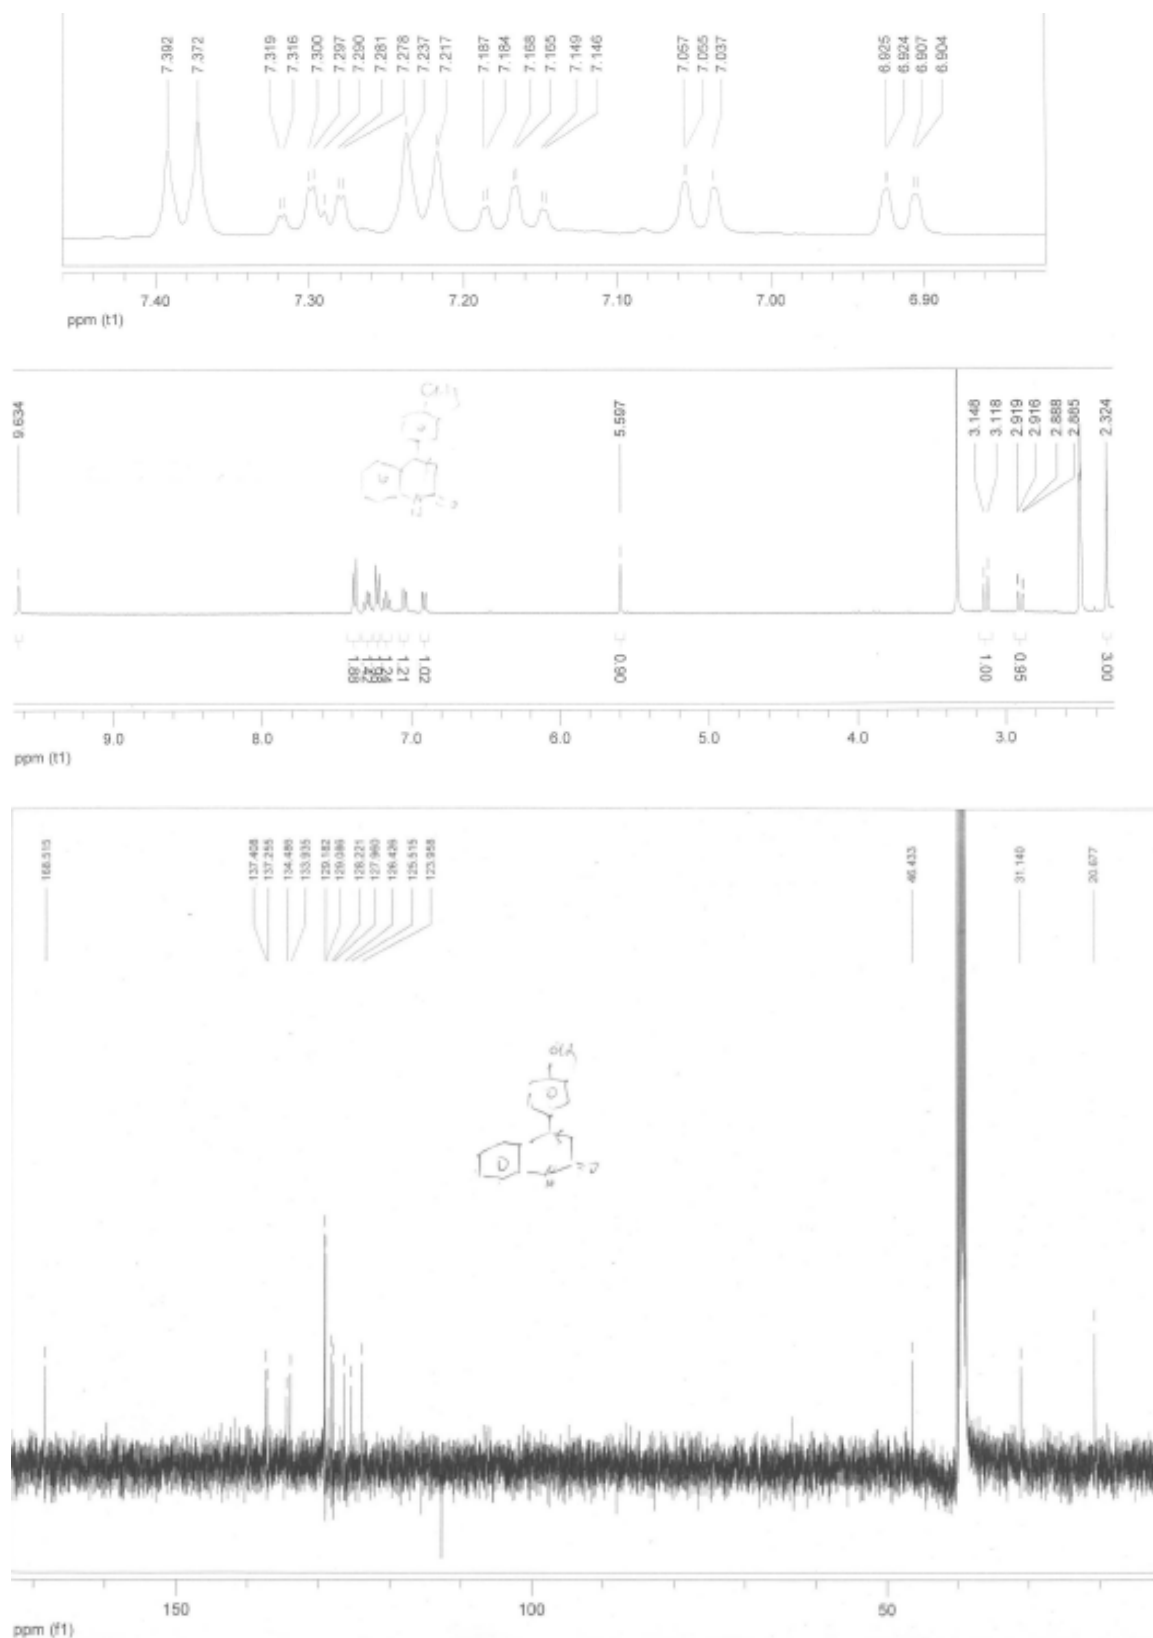

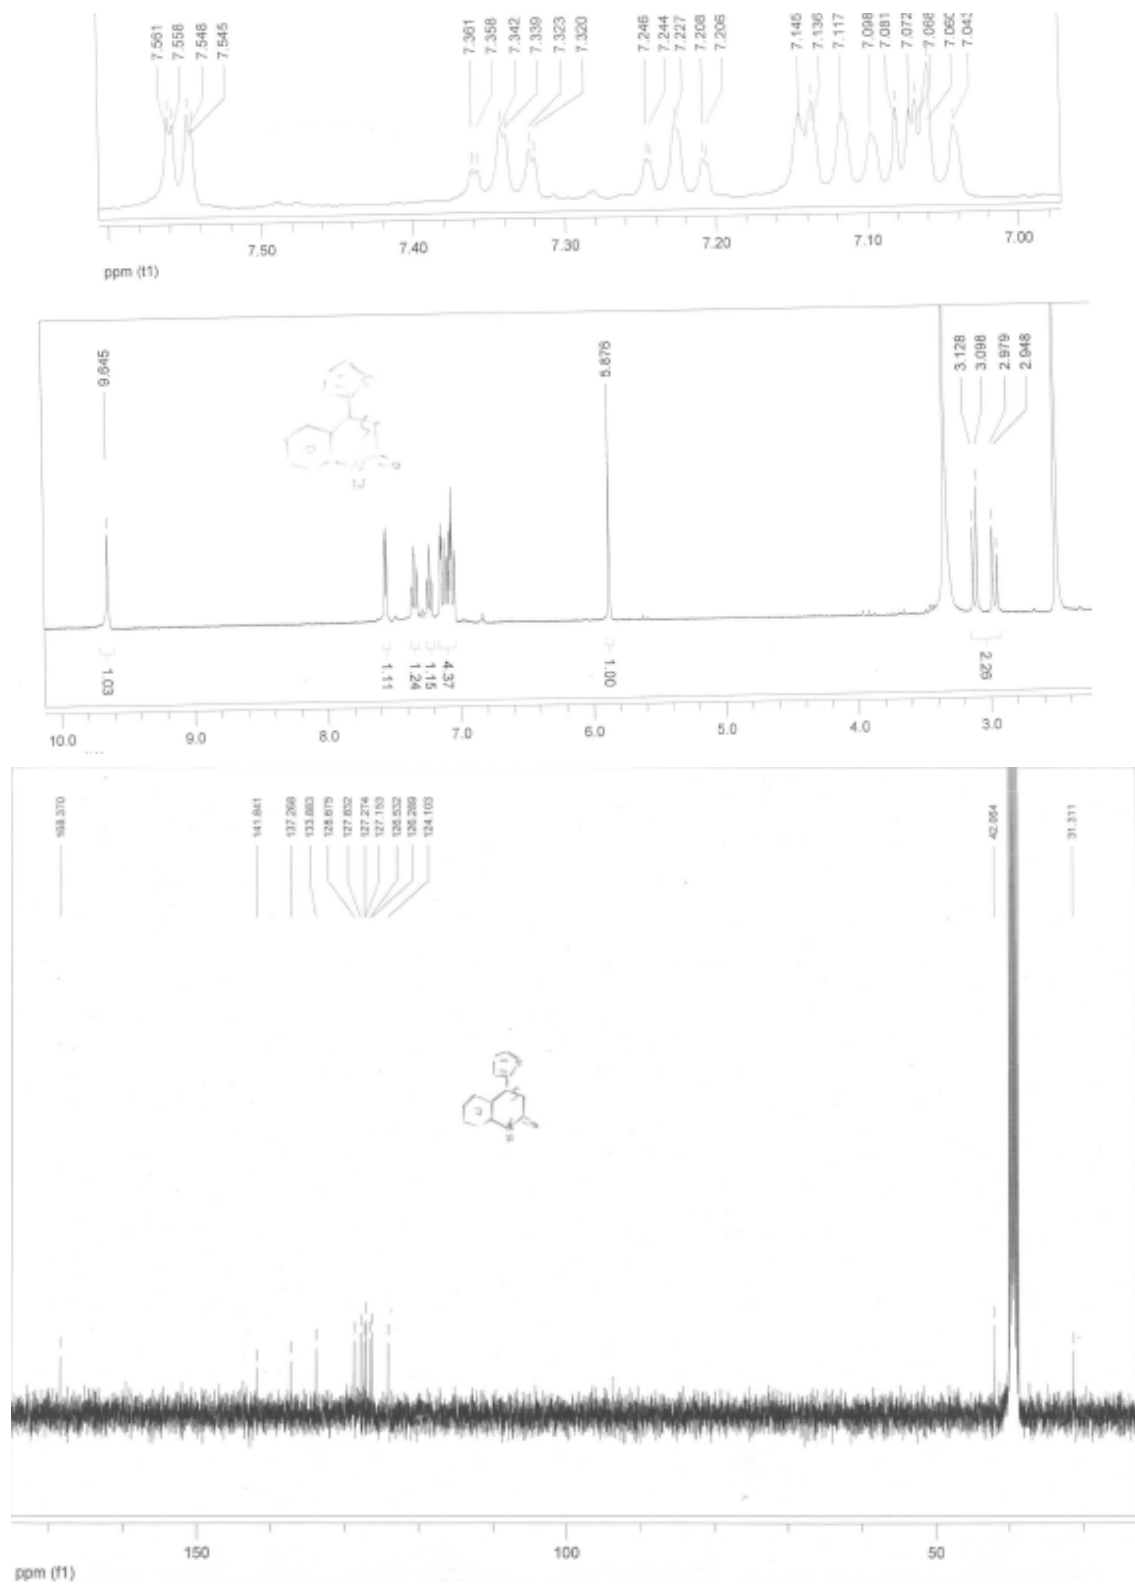

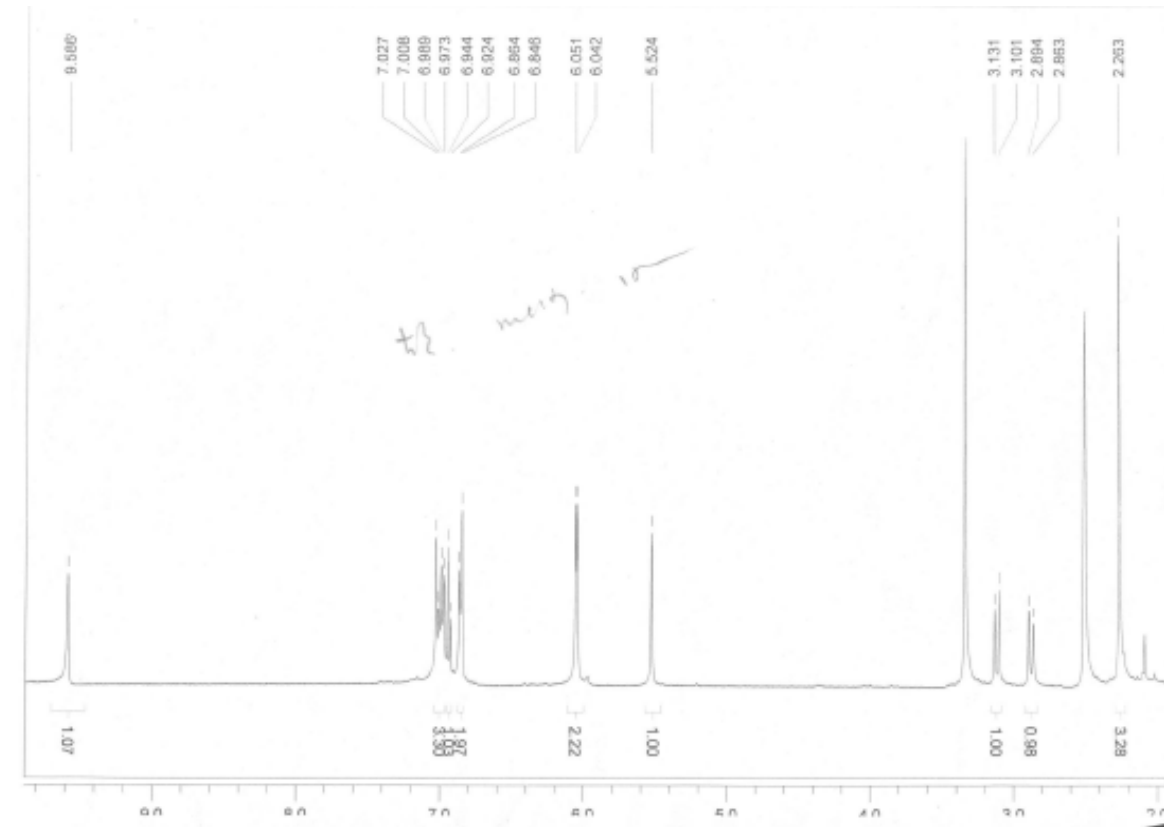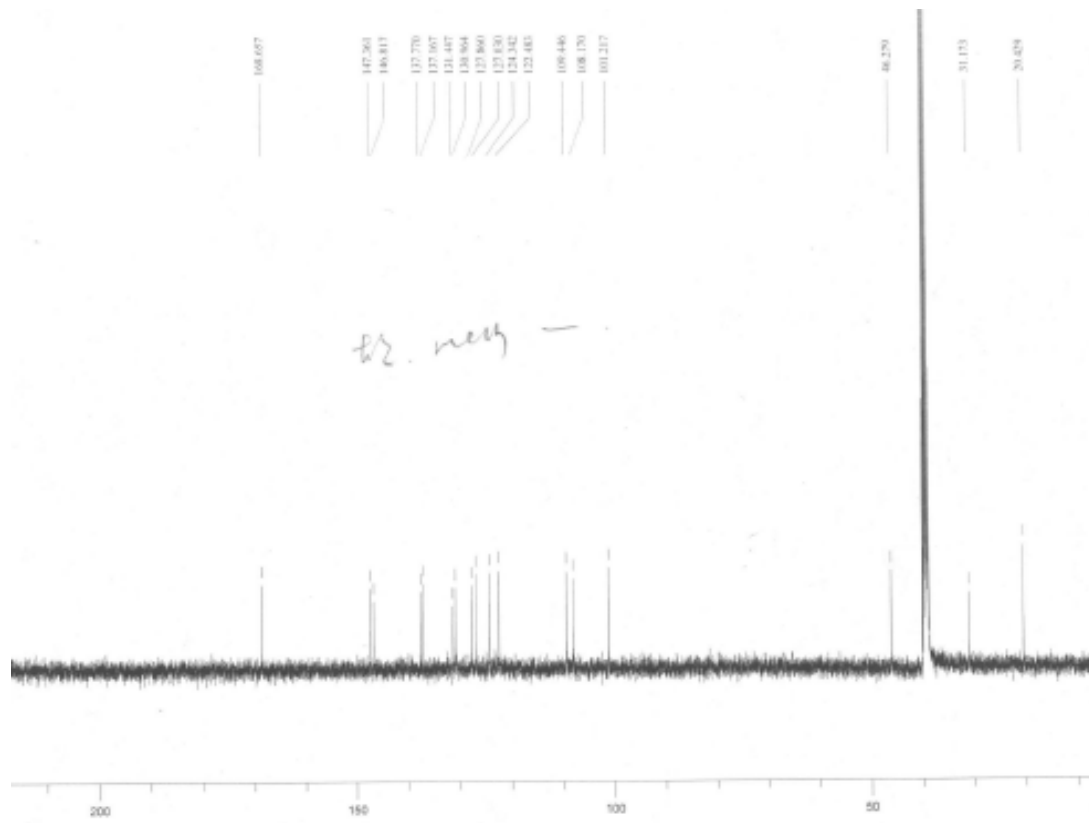

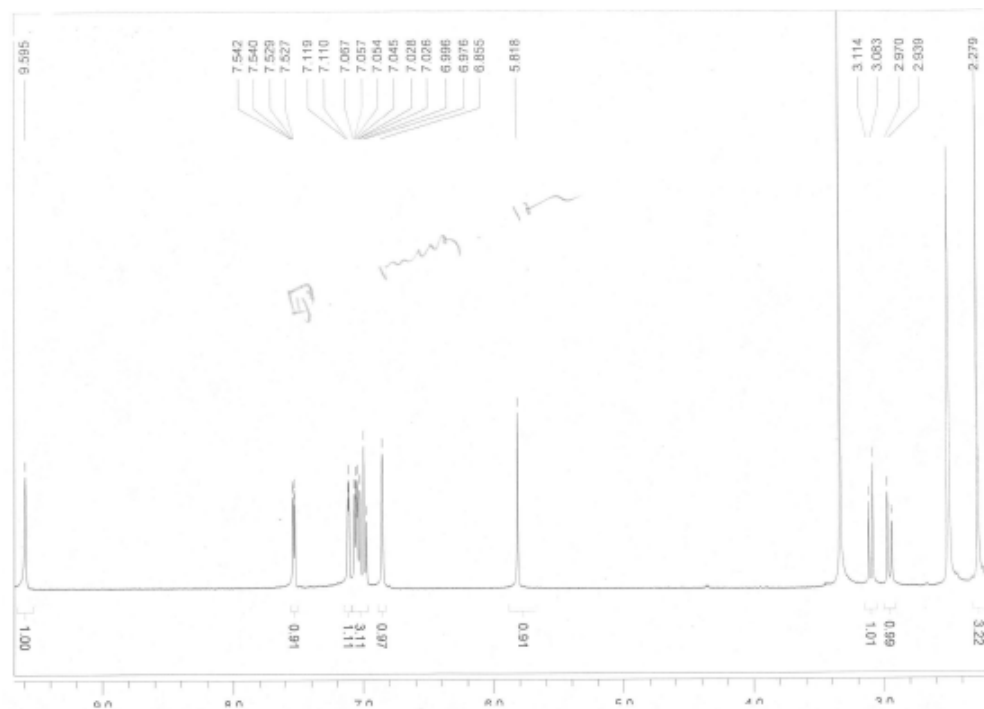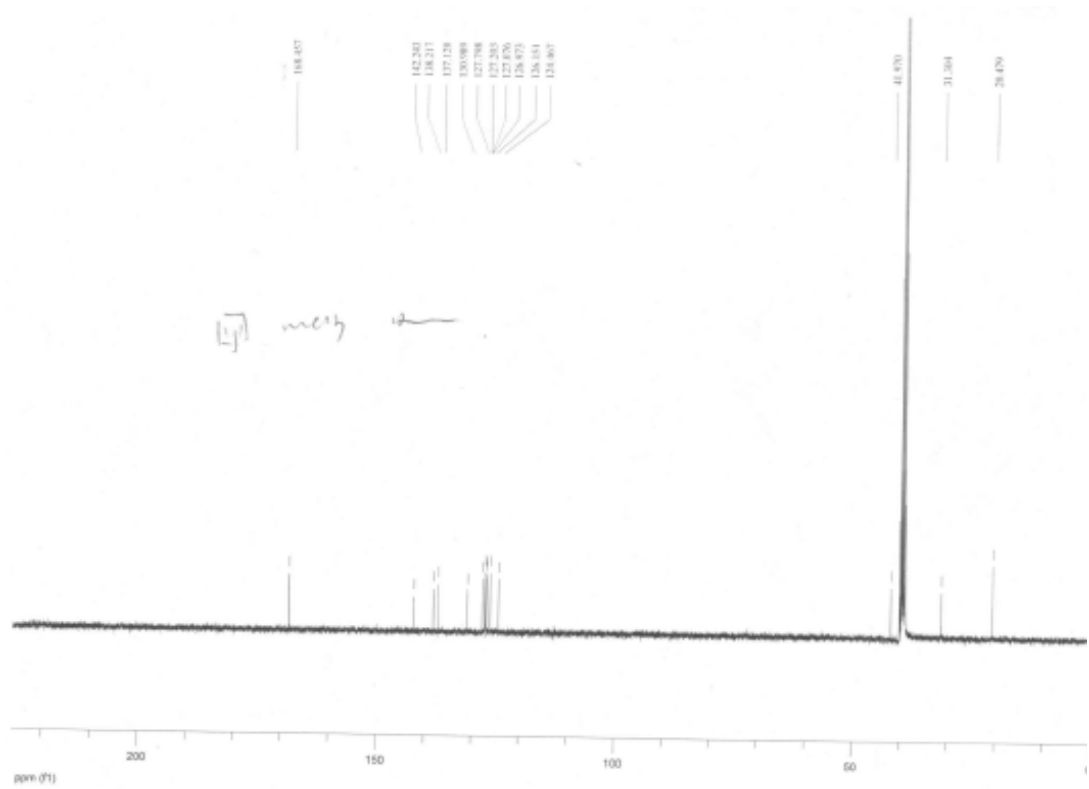

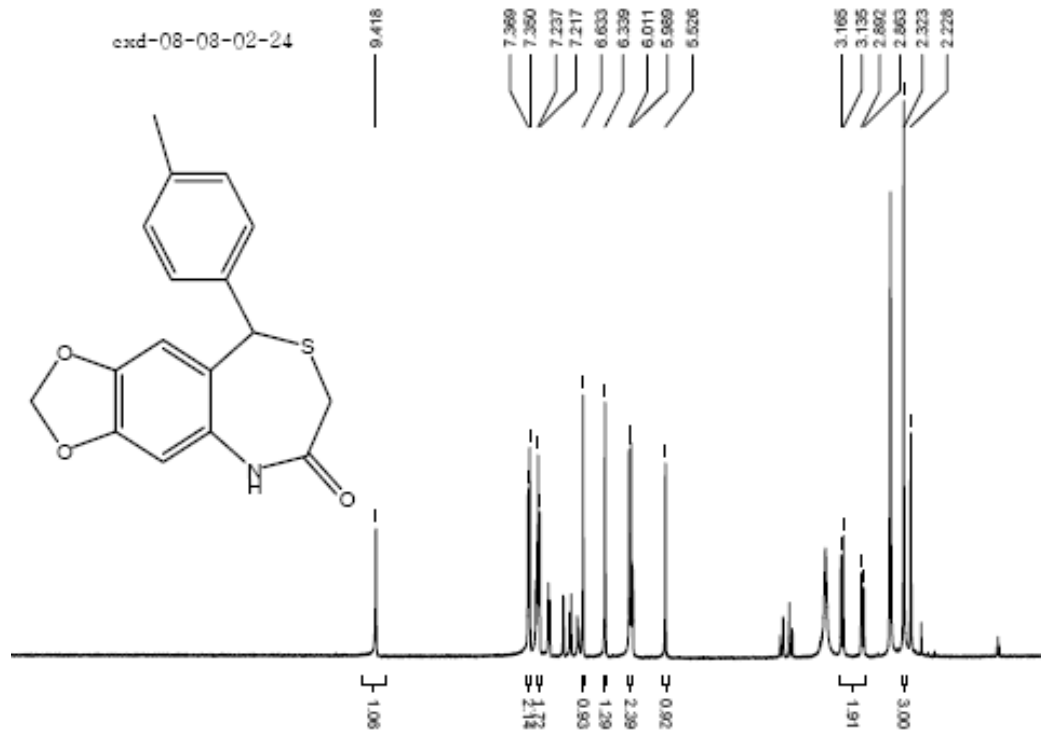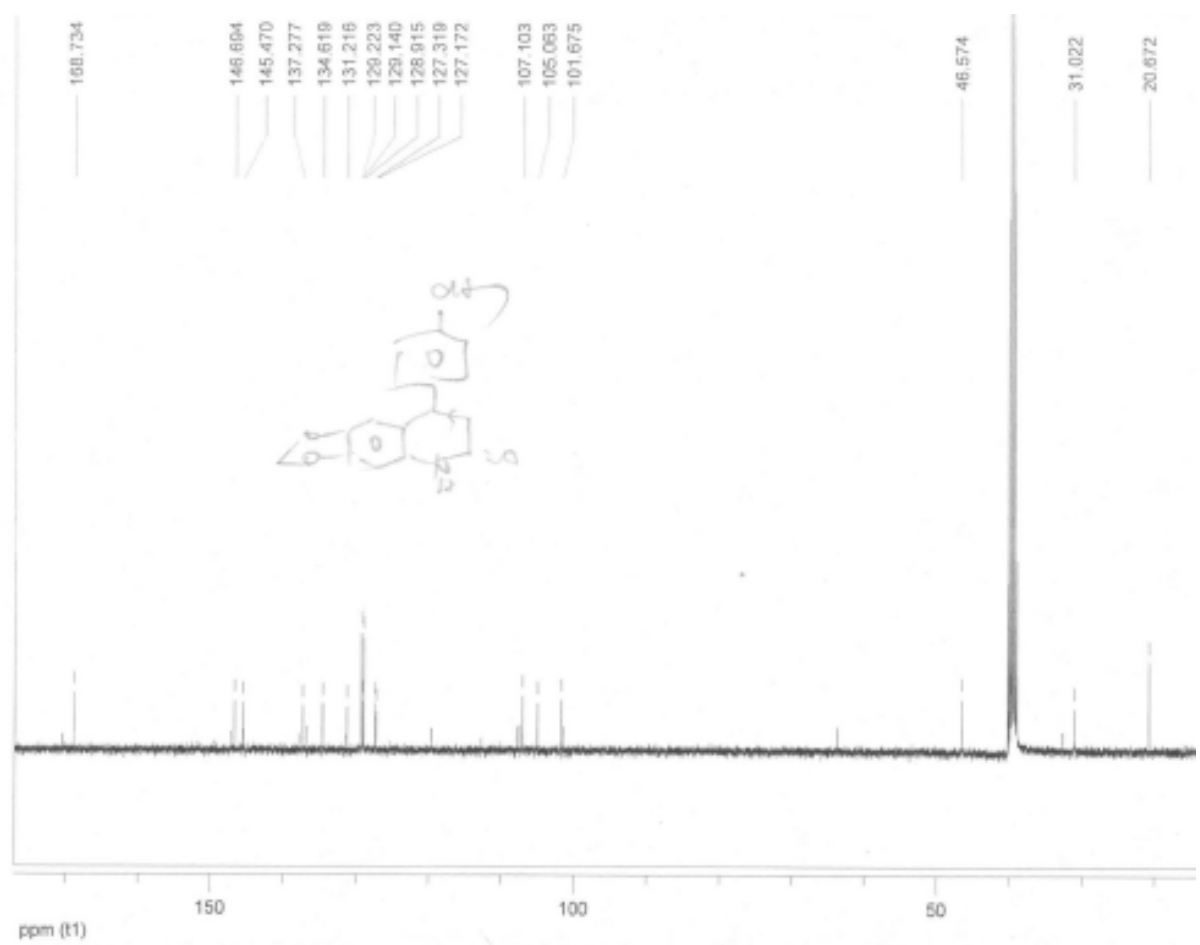

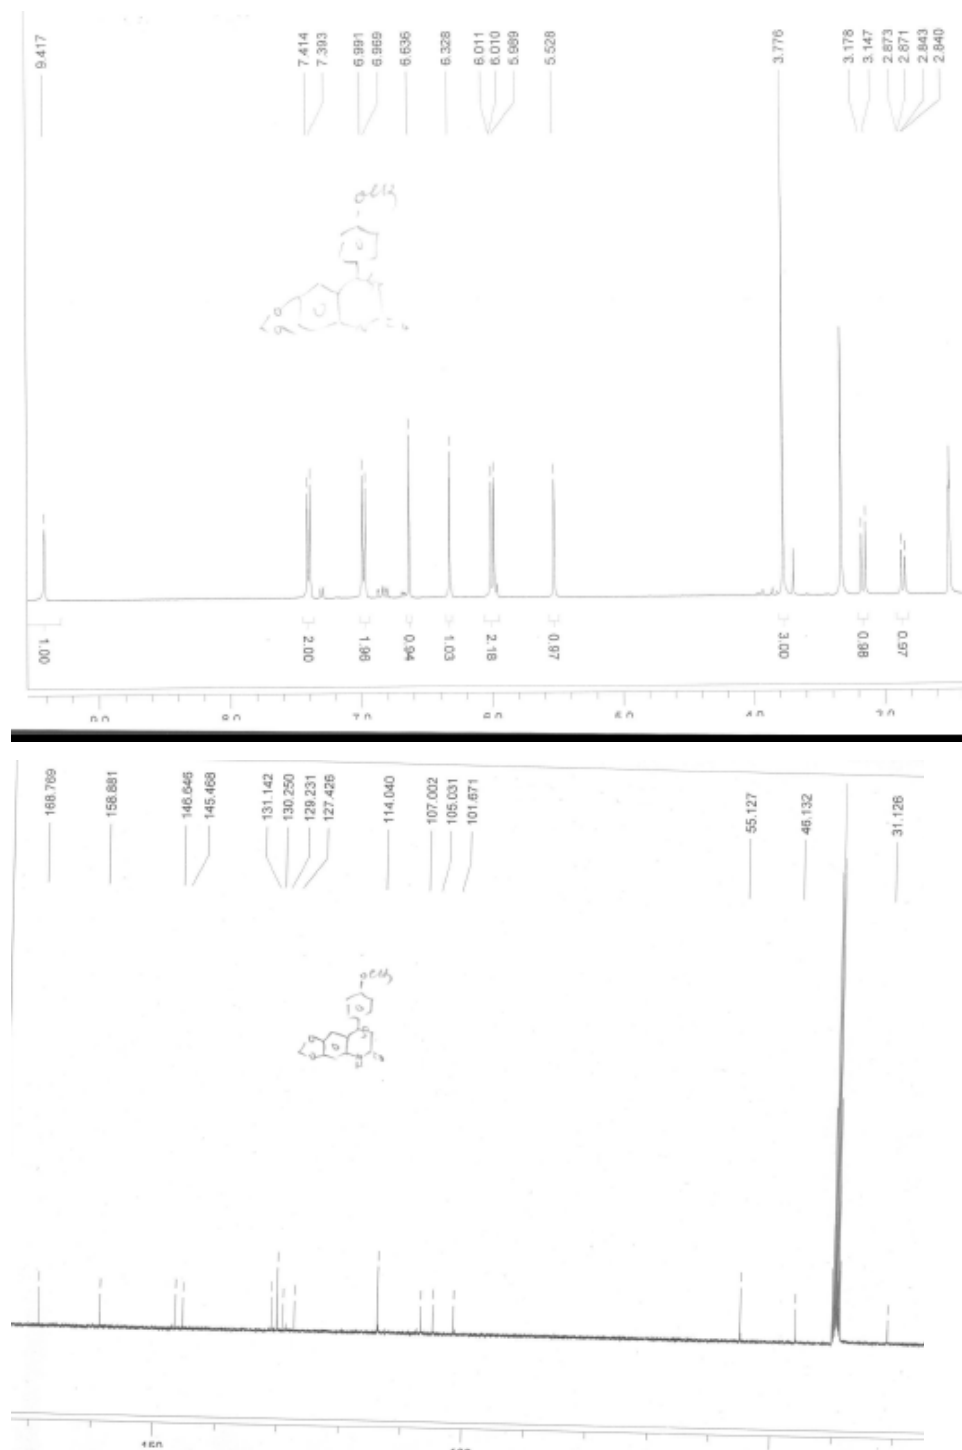

4q

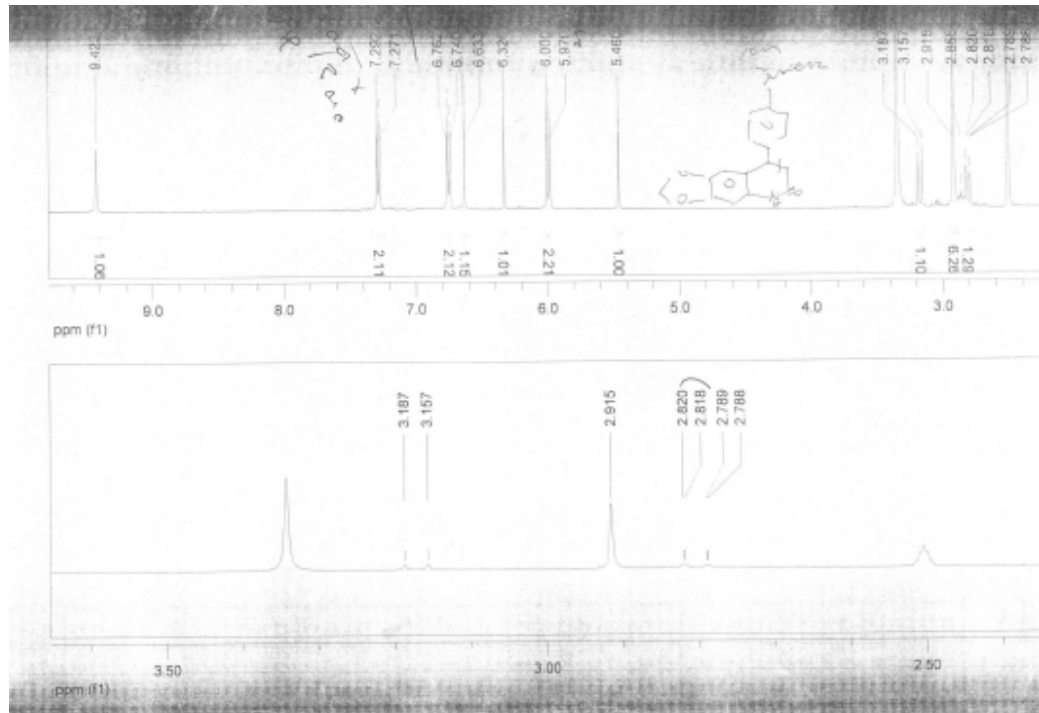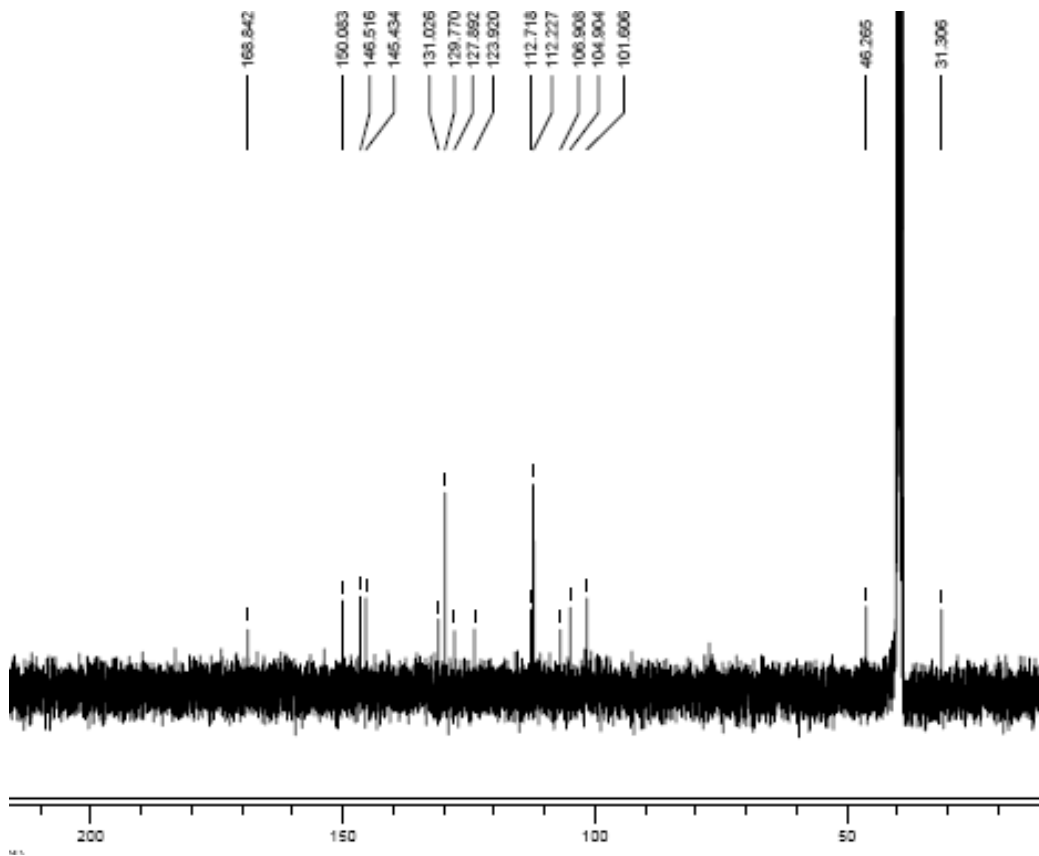

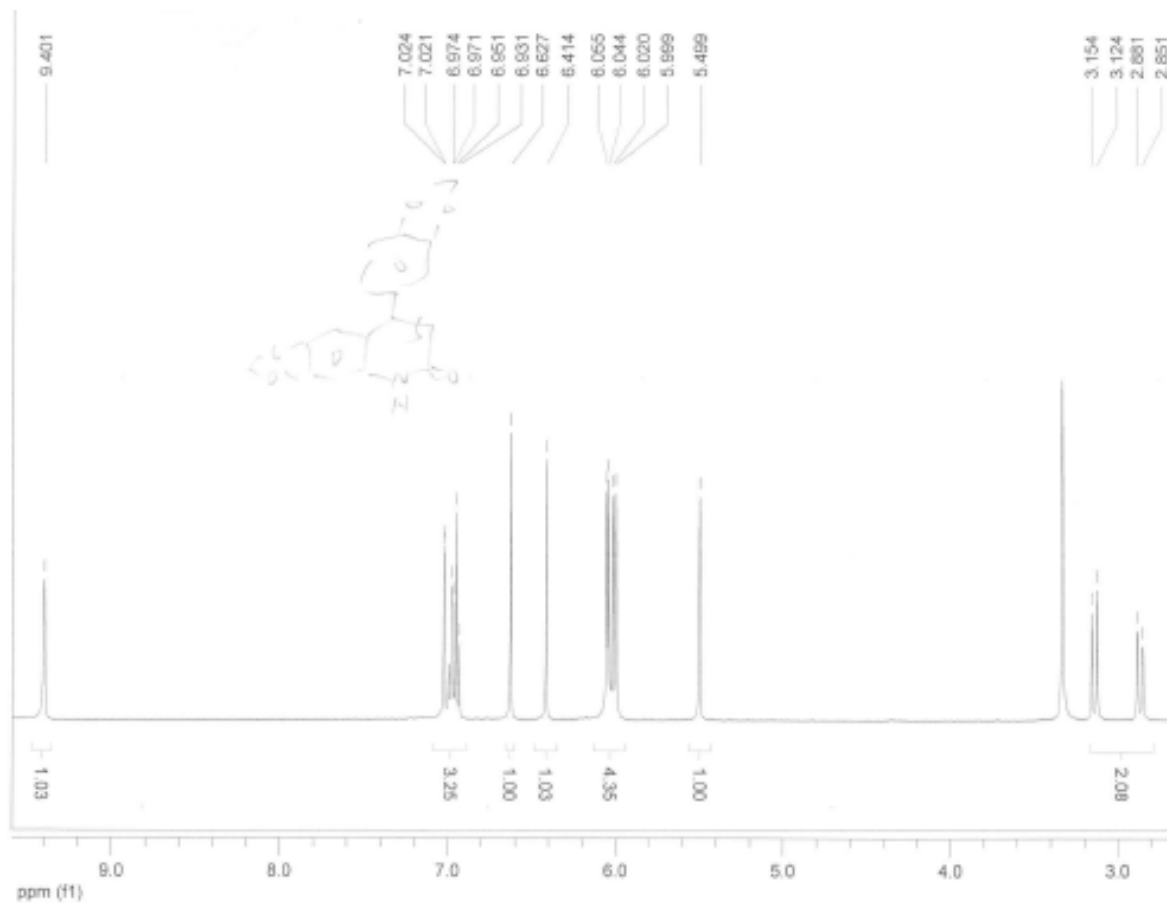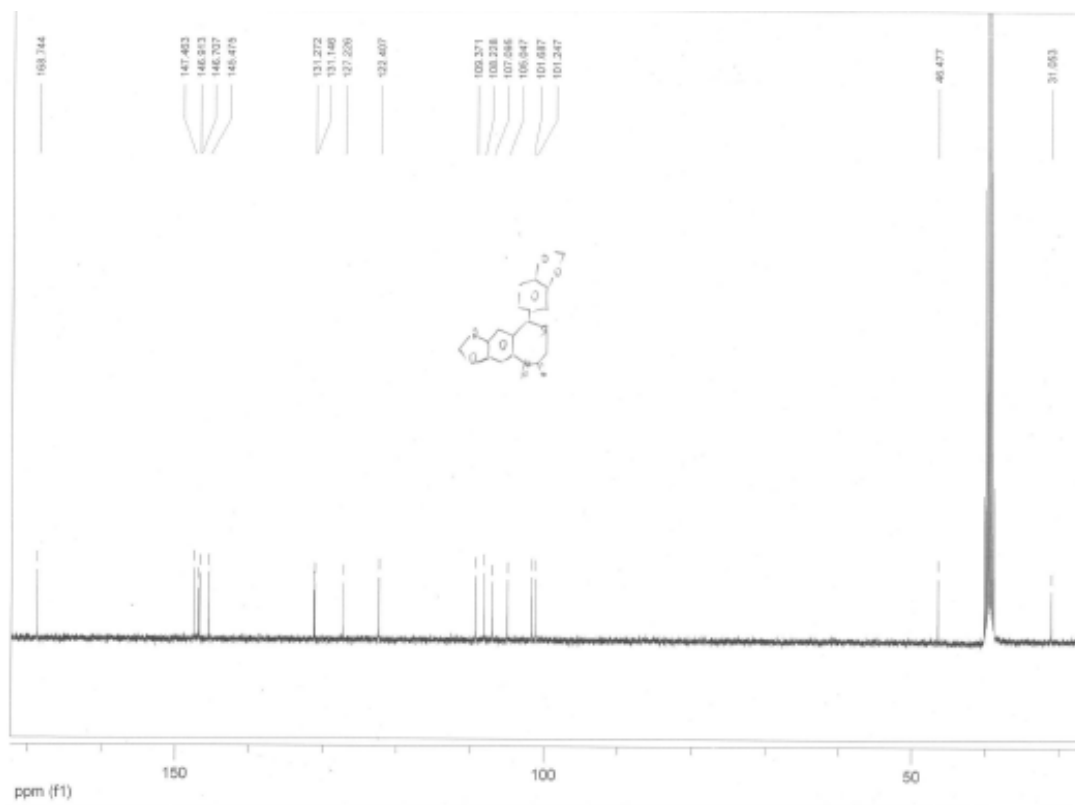



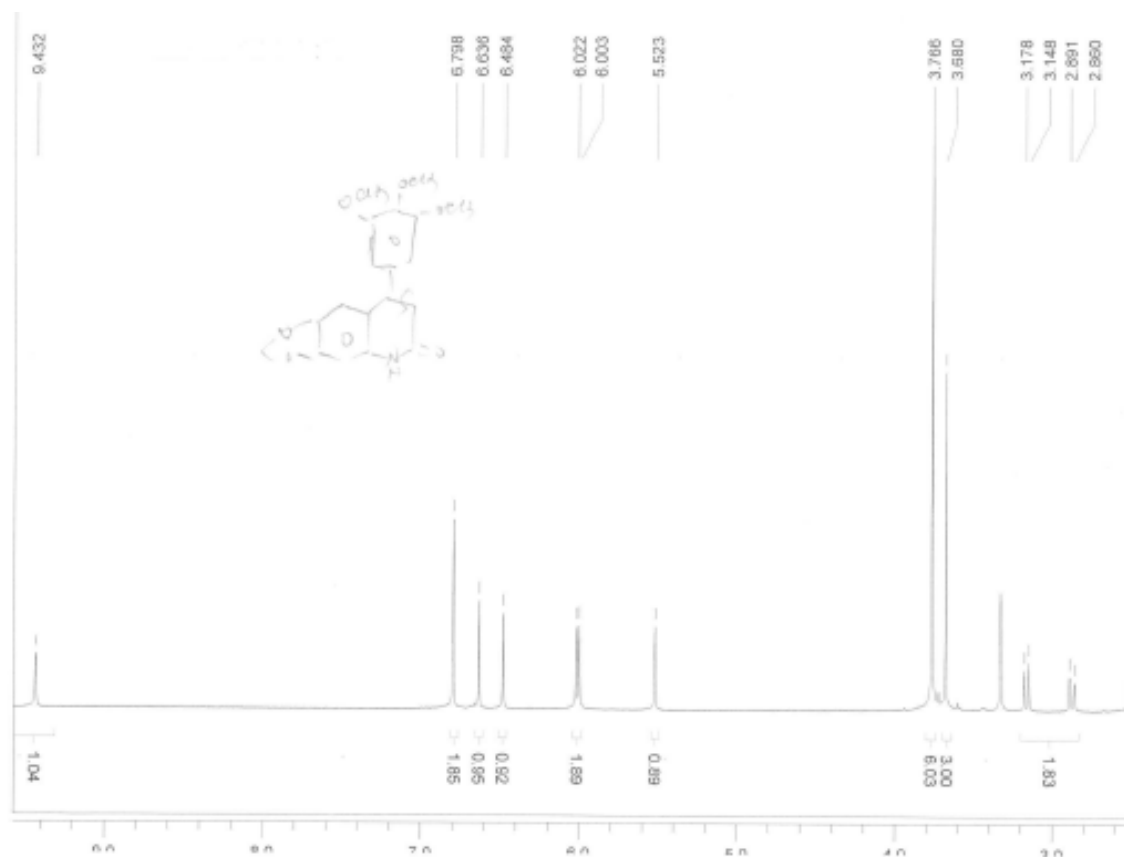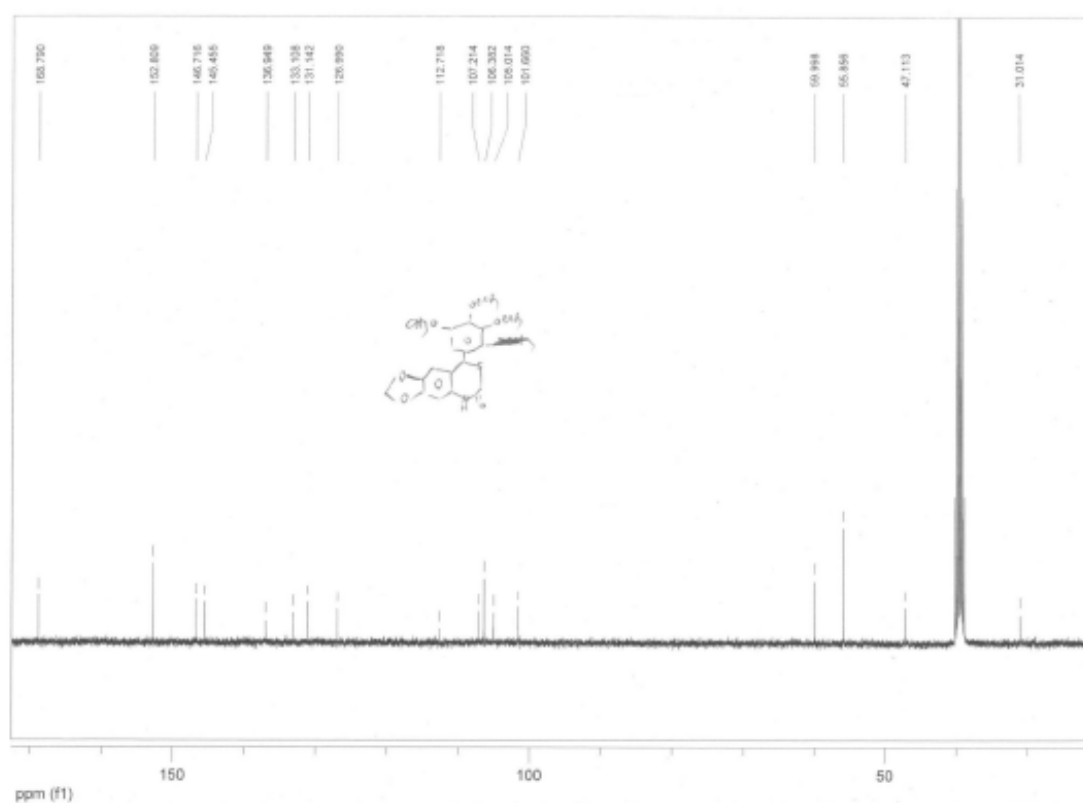

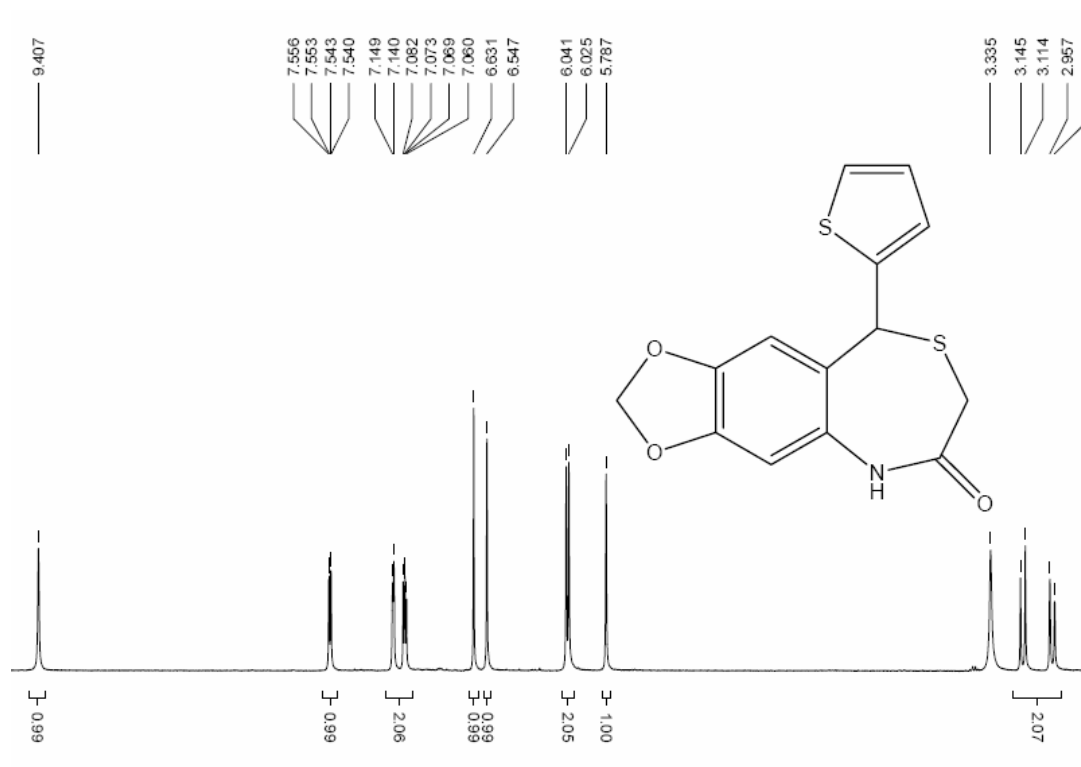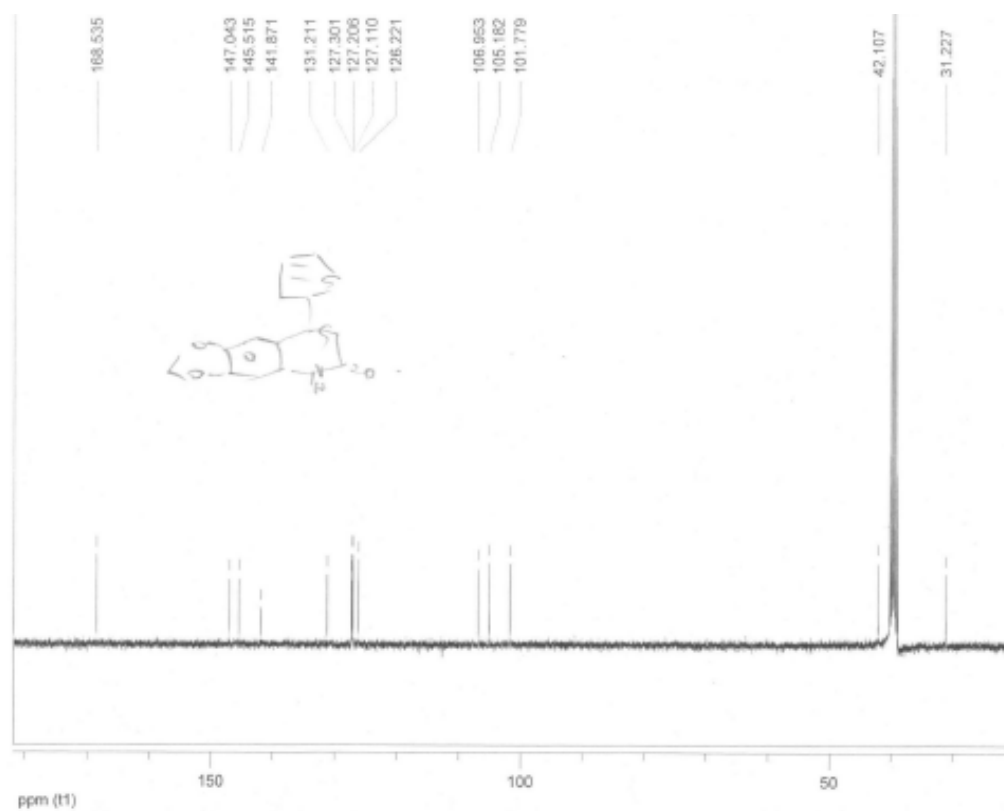

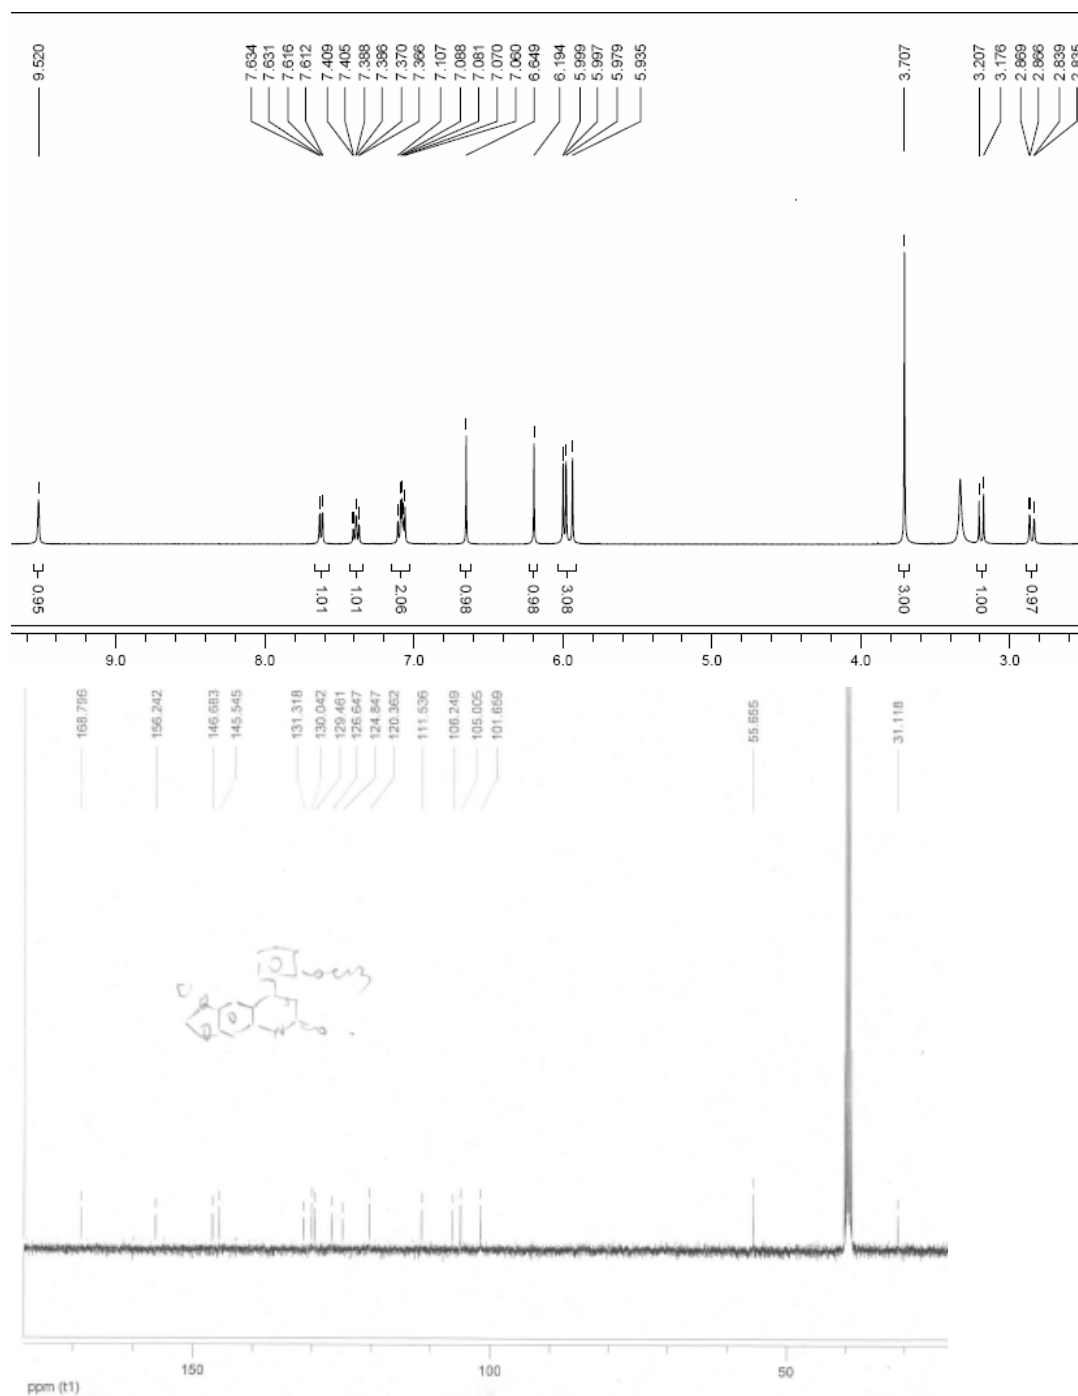

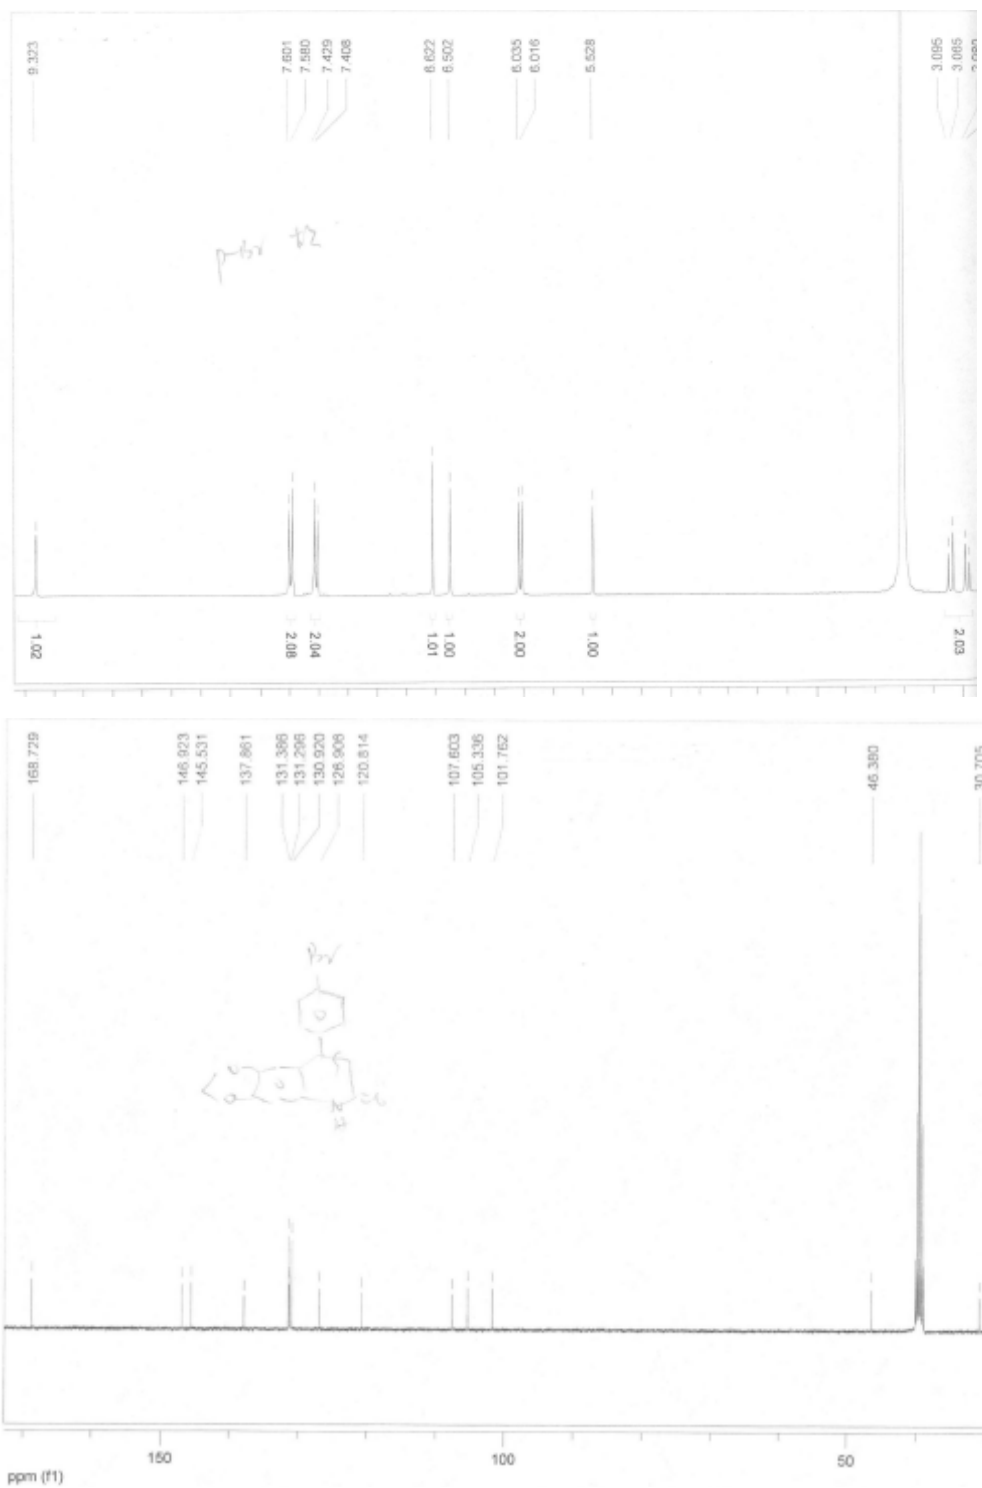

4w

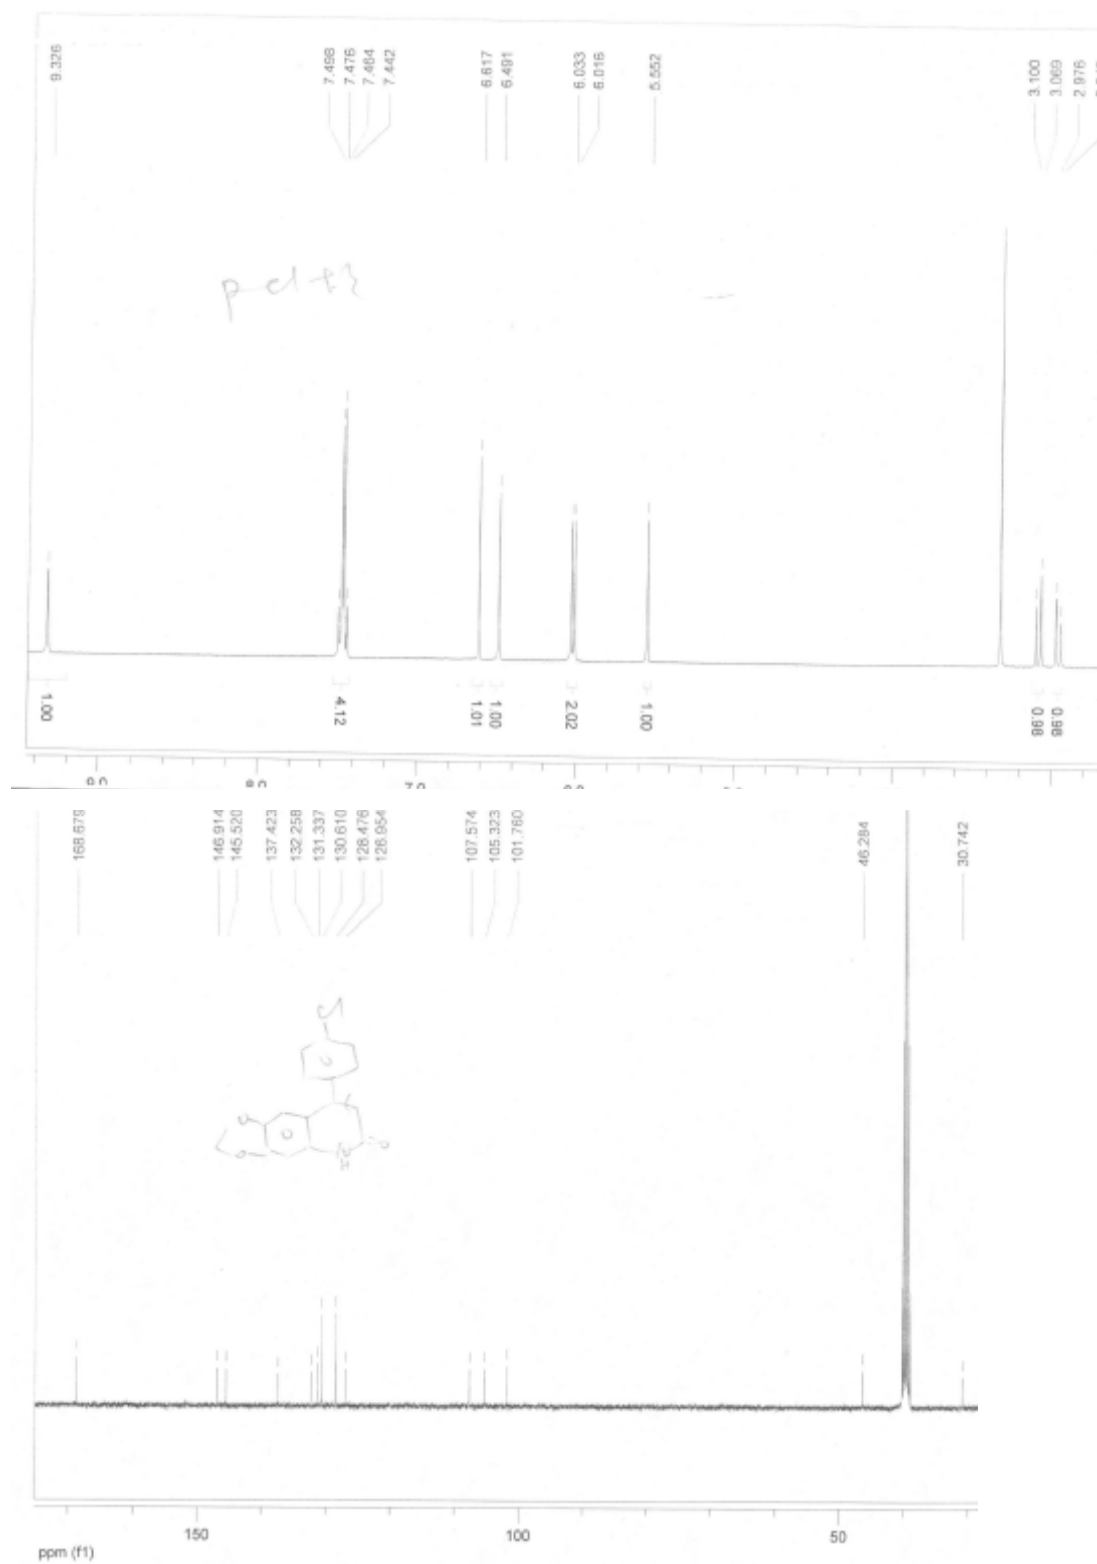

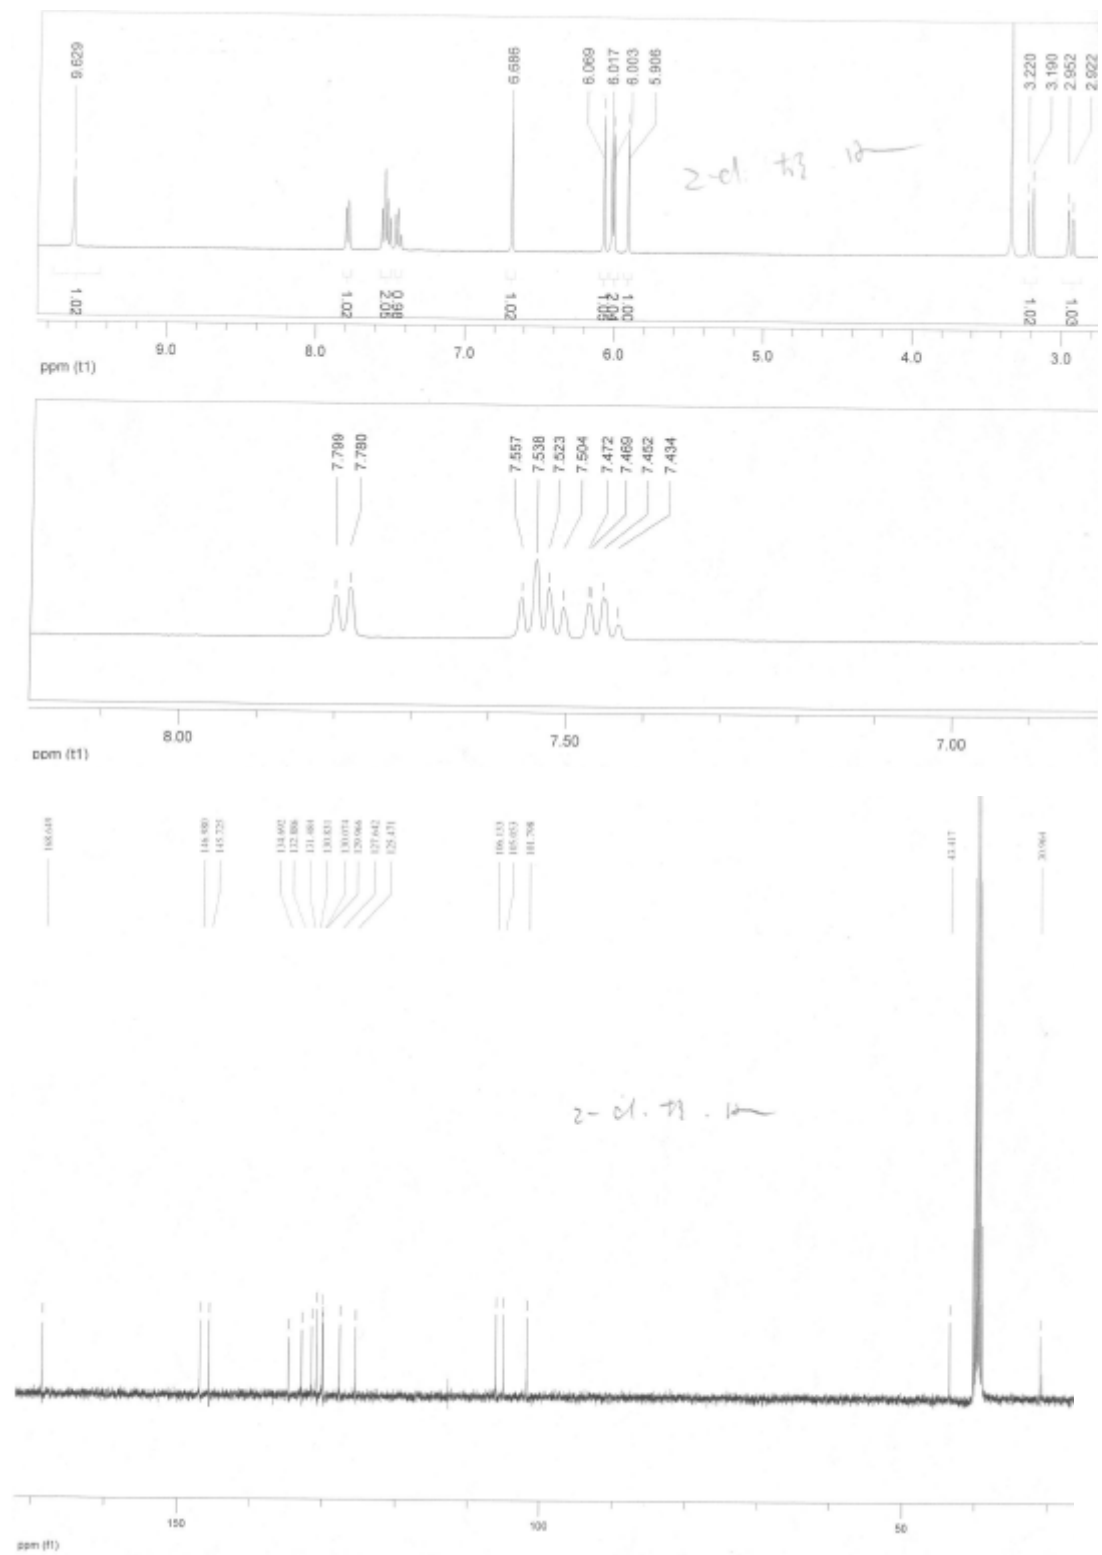



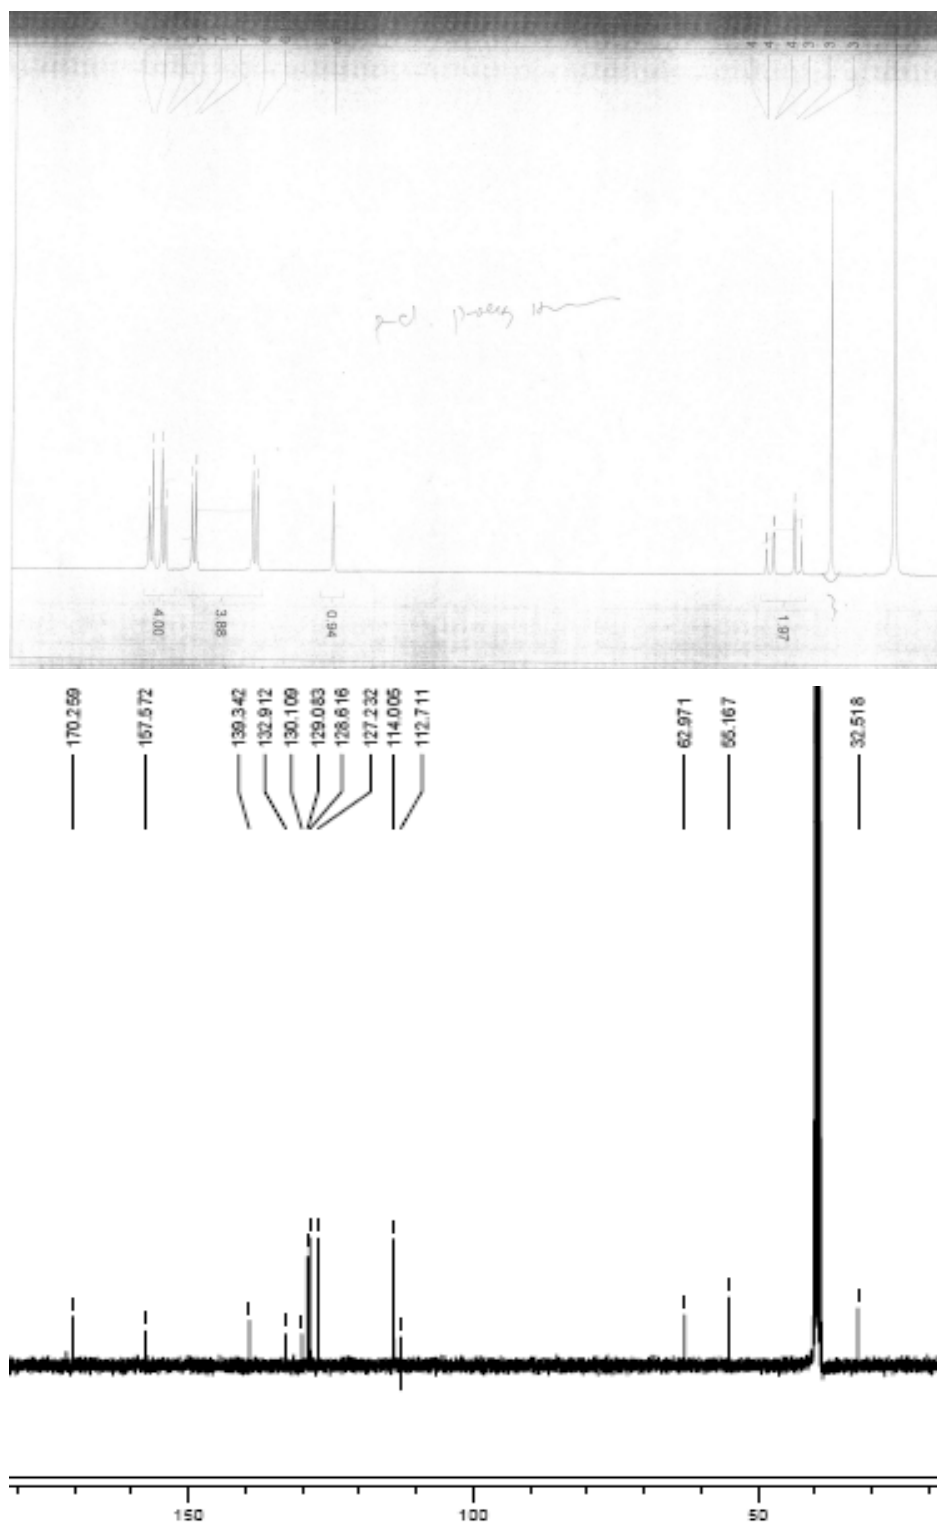

Supplement: b815879g.pdf [file b815879g.pdf]
